# Supplementary material for: FDA-approved cannabidiol [Epidiolex®] alleviates Gulf War Illness-linked cognitive and mood dysfunction, hyperalgesia, neuroinflammatory signaling, and declined neurogenesis
Source: PubMed Central journal article supplement (PMC11340098; doi:10.1186/s40779-024-00563-2), 2024-08-22
Supplement: 40779_2024_563_MOESM1_ESM.pdf [file 40779_2024_563_MOESM1_ESM.pdf]

## Results

**Adult rats subjected to stress alone (i.e., 15 min of restraint stress daily for 28 d) did not develop cognitive and mood impairments, activated microglia, or a decline in neurogenesis in the hippocampus**

### *Animals and study design*

A cohort of 8-week-old male Sprague Dawley rats ( $n = 10$ ) received restraint stress for 15 min once daily over 28 d. Another cohort of age-matched animals housed in the vivarium served as naïve controls ( $n = 10$ ). Sixteen weeks after the restraint stress regimen, animals in both groups were interrogated with a series of neurobehavioral tests. After completion of neurocognitive tests, these rats were deeply anesthetized with isoflurane, and their brains were fixed with 4% paraformaldehyde via intracardiac perfusions. Fixed brain tissues were processed for immunohistochemical and immunofluorescence studies. The Institutional Animal Care and Use Committee of Texas A&M University approved all studies conducted in this investigation (Animal Use Protocol number: 2022-0166D).

### *Fifteen-minute of restraint stress daily for 28 d in naïve rats does not lead to object recognition memory impairment*

To evaluate a recognition memory task that depends on the function of the hippocampus and the perirhinal cortex, each animal underwent a novel object recognition test (NORT), as detailed in our previous studies [1, 2] (**Additional file 1: Fig. S1a**). Animals proficient in object recognition memory tend to explore a novel object (NO) over a familiar object (FO). In trial 3 (performed 30 min after trial 2), naïve control rats preferred the NO vs. the FO ( $P < 0.0001$ , **Additional file 1: Fig. S1b**). Remarkably, naïve control rats subjected to 15-minute restraint stress daily for 28 d also maintained proficiency for object recognition memory by exploring the NO for prolonged periods than the FO ( $P < 0.05$ , **Additional file 1: Fig. S1b**). Analysis of the discrimination index (DI) for the NO revealed no differences in object recognition memory

between the age-matched naïve group and the group subjected to the stress ( $P > 0.05$ , **Additional file 1: Fig. S1c**). Thus, 15 min of restraint stress daily for 28 d in naïve rats does not impair object recognition memory.

***Fifteen-minute of restraint stress daily for 28 d in naïve rats does not lead to pattern separation impairment***

We next evaluated the pattern separation function, which depends upon the integrity of the dentate gyrus in the hippocampus, including the extent of neurogenesis [3, 4]. The test involved 4 trials with an inter-trial interval of 30 min. The test was performed as described in our previous studies [2]. In pattern separation test (PST), animals proficient in pattern separation spend more time exploring the NO on pattern 2 (NO on P2) than the FO on pattern 2 (FO on P2) in T4 (**Additional file 1: Fig. S2a**). The ability for pattern separation was observed in both naïve rats and naïve rats that underwent 15 min of restraint stress daily for 28 d, as they displayed a higher affinity to explore the NO on P2 vs. the FO on P2 ( $P < 0.05$ , **Additional file 1: Fig. S2b**). Analysis of the NO on P2 – DI confirmed that pattern separation function did not differ between naïve rats and naïve rats that underwent stress ( $P > 0.05$ , **Additional file 1: Fig. S2c**). Thus, 15 min of restraint stress daily for 28 d in naïve rats does not impair pattern separation function.

***Fifteen-minute of restraint stress daily for 28 d in naïve rats does not lead to anhedonia***

The anhedonia was assessed through a sucrose preference test (SPT), as described in our previous reports [2, 5, 6]. In SPT, naïve rats and naïve rats subjected to stress (15 min of restraint stress daily for 28 d) preferred sucrose water over standard water, implying no anhedonia ( $P < 0.01$ , **Additional file 1: Fig. S3a**). Furthermore, the sucrose preference rate (SPR) of naïve rats and naïve rats subjected to stress were comparable ( $P > 0.05$ , **Additional file 1: Fig. S3b**). Also, the total fluid consumption did not differ between the two groups ( $P > 0.05$ , **Additional file 1: Fig. S3b**). Thus, 15 min of restraint stress daily for 28 d in naïve rats does not result in anhedonia.

***Fifteen-minute of restraint stress daily for 28 d in naïve rats does not activate microglia in the hippocampus***

We analyzed the possible chronic activation of microglia in the hippocampus of naïve rats subjected to stress via visualization of IBA-1<sup>+</sup> microglia expressing CD68 (a marker of activated microglia) through dual immunofluorescence for IBA-1 and CD68 (**Additional file 1: Fig. S4**). Analysis of the percentage of IBA-1<sup>+</sup> cells expressing CD68 revealed similar percentages of microglia displaying CD68 between naïve rats and naïve rats that underwent stress ( $P > 0.05$ , **Additional file 1: Fig. S4**). Thus, 15 min of restraint stress daily for 28 d in naïve rats does not lead to chronic activation of microglia in the hippocampus.

***Fifteen-minute of restraint stress daily for 28 d in naïve rats does not alter neurogenesis in the hippocampus***

Next, we quantified the status of hippocampal neurogenesis via stereological quantification of doublecortin-positive (DCX<sup>+</sup>) newly born neurons in the subgranular zone – granule cell layer (SGZ-GCL). The morphology and distribution of DCX<sup>+</sup> neurons in the SGZ-GCL from both groups are illustrated (**Additional file 1: Fig. S5**). The number of DCX<sup>+</sup> newly born neurons in the SGZ-GCL did not differ between the naïve group and the naïve group subjected to stress ( $P > 0.05$ , **Additional file 1: Fig. S5**). Thus, 15 min of restraint stress daily for 28 d in naïve rats does not lead to decreased neurogenesis in the hippocampus.

**Cannabidiol (CBD) treatment did not cause weight loss in rats with chronic GWI**

Since one of the adverse effects of CBD is decreased appetite, we monitored weekly body weights over 16 weeks in GWI rats that received VEH or CBD during the treatment regimen using repeated measures of two-way ANOVA. Interestingly, we did not observe statistically significant differences in body weights between the two groups during the 16-week treatment period (**Additional file 1: Fig. S6**).

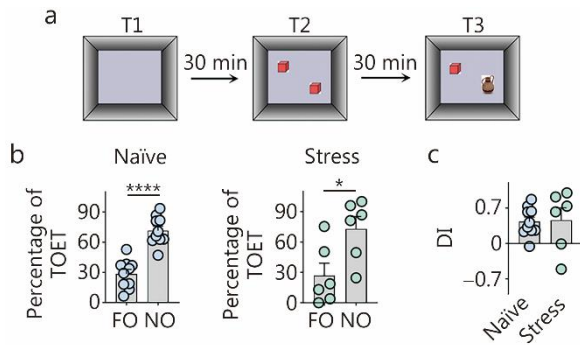

**Fig. S1** Fifteen-minute of restraint stress daily for 28 d in naïve rats does not impair object recognition memory. **a** The sequence of trials in a NORT. **b** Percentages of the TOETs spent with the FO and the NO in naïve rats and naïve rats subjected to stress ( $n = 10$ ). **c** The NO DI between the two groups. \* $P < 0.05$ , \*\*\*\* $P < 0.0001$ . Please refer to Table S4 in Additional file 1 for detailed statistical information. NORT novel object recognition test, T trial, FO familiar object, NO novel object, TOET total object exploration times, DI discrimination index

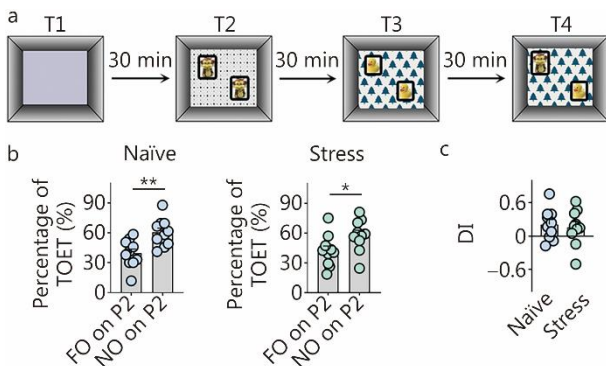

**Fig. S2** Fifteen-minute of restraint stress daily for 28 d in naïve rats does not impair their pattern separation ability. **a** The sequence of trials in a PST. **b** Percentages of the TOETs spent with the FO on P2 and the NO on P2 in naïve rats and naïve rats subjected to stress ( $n= 10$ ). **c** The NO on the P2 DI between the two groups. \* $P < 0.05$ , \*\* $P < 0.01$ . Please refer to Table S4 in Additional file 1 for detailed statistical information. PST pattern separation test, T trial, FO on P2 familiar object on pattern 2, NO on P2 novel object on pattern 2, TOET total object exploration time, DI discrimination index

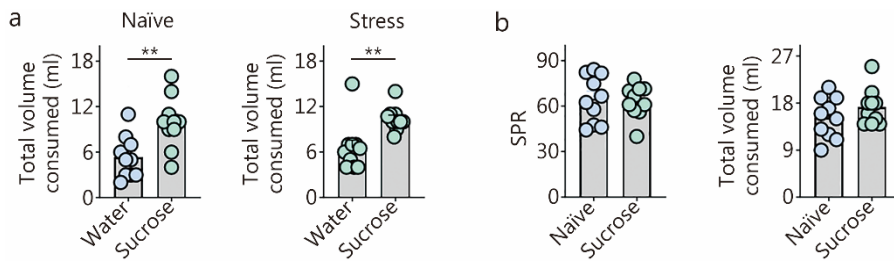

**Fig. S3** Fifteen-minute of restraint stress daily for 28 d in naïve rats does not cause anhedonia. **a** The volumes of standard water and sucrose-containing water consumed by animals in naïve rats and naïve rats subjected to stress ( $n = 10$ ) in the SPT. **b** SPR and total volume consumed between the two groups.  $**P < 0.01$ . Please refer to Table S4 in Additional file 1 for detailed statistical information. SPR sucrose preference rate, SPT sucrose preference test

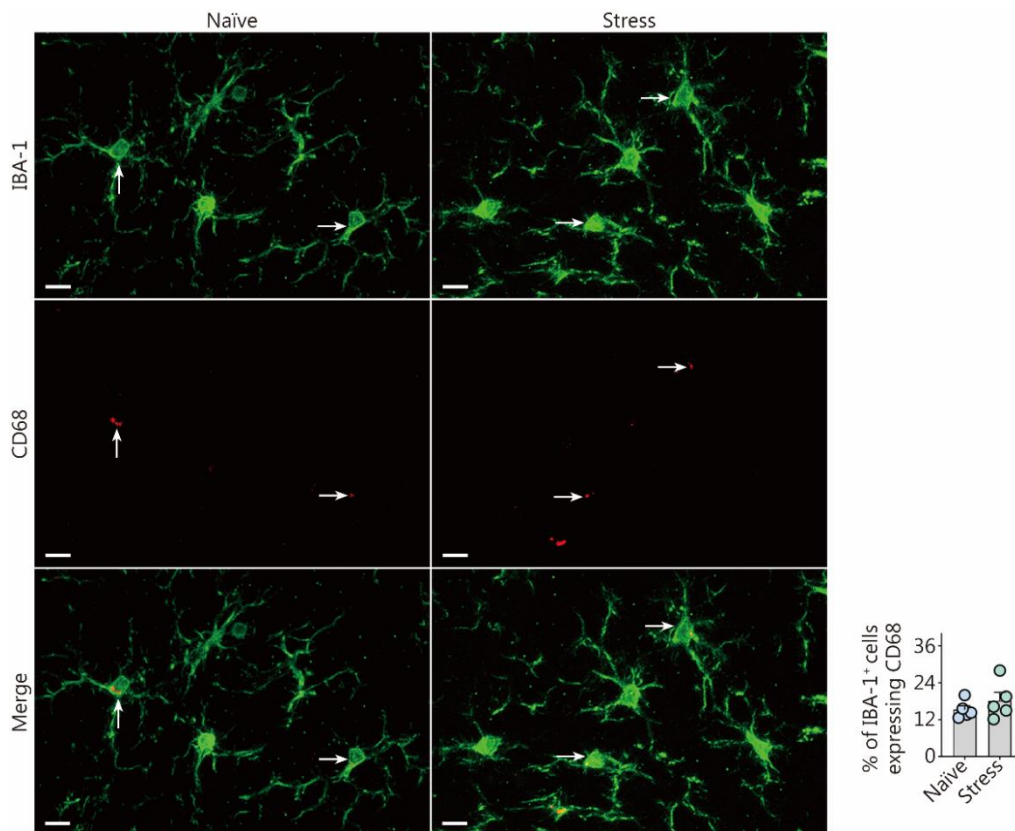

**Fig. S4** Fifteen-minute of restraint stress daily for 28 d in naïve rats does not cause microglia activation. The examples of IBA-1<sup>+</sup> microglia (green) expressing CD68 (red) in the hippocampal dentate gyrus from a naïve rat and a naïve rat that underwent stress (scale bar = 10  $\mu$ m). Arrows denote IBA-1<sup>+</sup> microglia expressing CD68. The bar chart compares percentages of IBA-1<sup>+</sup> microglia expressing CD68 in the hippocampus between the two groups. Please refer to Table S4 in Additional file 1 for detailed statistical information. IBA-1 ionized calcium-binding adapter molecule-1, CD68 cluster of differentiation 68

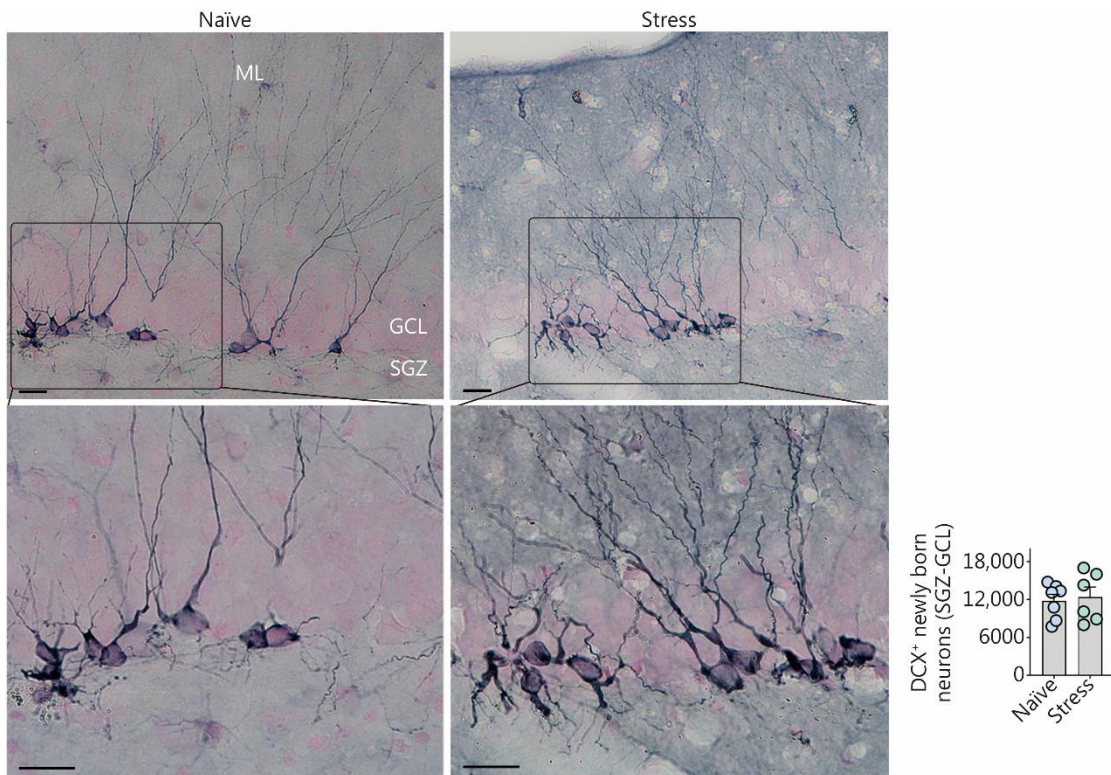

**Fig. S5** Fifteen-minute of restraint stress daily for 28 d in naïve rats does not cause changes in hippocampal neurogenesis. Figures illustrate examples of DCX<sup>+</sup> newly born neurons from a naïve rat and a naïve rat subjected to stress (scale bar = 25  $\mu$ m). The bar chart compares the number of DCX<sup>+</sup> newborn neurons between naïve rats and the naïve rats subjected to stress. Please refer to Table S4 in Additional file 1 for detailed statistical information. ML molecular level, GCL granule cell layer, SGZ subgranular zone, DCX doublecortin

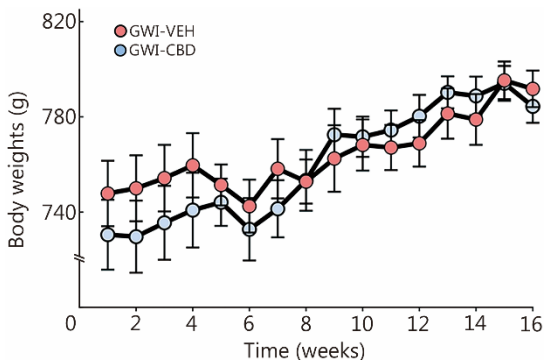

**Fig. S6** Comparison of weekly body weights for over 16 weeks in GWI rats that received vehicle (GWI-VEH) or CBD (GWI-CBD) during the treatment regimen. Please refer to Table S5 in Additional file 1 for detailed statistical information. CBD cannabidiol, GWI Gulf War Illness, VEH vehicle

**Table S1** List of reagents and ELISA kits employed in the study

| <b>ELISA kits</b>                  | <b>Source</b>                              | <b>Catalog number</b> |
|------------------------------------|--------------------------------------------|-----------------------|
| Anandamide                         | My BioSource San Diego, CA, USA            | MBS7254942            |
| ASC                                | My BioSource, San Diego, CA, USA           | MBS7215885            |
| CAT                                | Cayman Chemicals, Ann Arbor, Michigan, USA | 707002                |
| Cleaved caspase-1                  | Abcam, Cambridge, MA, USA                  | AB39412               |
| DEET                               | Chem Service Inc., West Chester, PA, USA   | S-12618A1-1ML         |
| IFN- $\gamma$                      | Raybiotech, Peachtree Corners, GA, USA     | ELR-IFNg              |
| IL-1 $\beta$                       | R&D Systems, Minneapolis, MN, USA          | DY501-05              |
| IL-6                               | R&D Systems Minneapolis, MN, USA           | DY406-05              |
| IL-18                              | R&D Systems, Minneapolis, MN, USA          | DY521-05              |
| MDA                                | Cayman Chemicals, Ann Arbor, Michigan, USA | 10009055              |
| NF- $\kappa$ B p65                 | Aviva Systems Biology, San Diego, CA, USA  | OKWB00365             |
| NLRP3                              | Abcam, Cambridge, MA, USA                  | AB277086              |
| PCs                                | Cayman Chemicals, Ann Arbor, Michigan, USA | 10005020              |
| Permethrin                         | Chem Service Inc., West Chester, PA, USA   | N-12848-250MG         |
| Pierce BCA reagent kit             | Thermo Fisher Scientific, Waltham, USA     | 23225                 |
| p-JAK-1                            | Raybiotech, Peachtree Corners, GA, USA     | PEL-JAK1-Y1022-1      |
| p-STAT-1                           | Cell Signaling, Danvers, MA, USA           | 73582                 |
| Protease and phosphatase inhibitor | Thermo Fisher Scientific, Waltham, MA, USA | PI78441               |
| Pyridostigmine bromide             | Sigma, St. Louis, MO, USA                  | P9797                 |
| SOD                                | Cayman Chemicals, Ann Arbor, Michigan, USA | 706002                |
| Tissue extraction reagent          | Thermo Fisher, Waltham, MA, USA            | FNN0071               |

*ASC* apoptosis associated speck-like protein containing a C-terminal caspase recruitment domain, *CAT* catalase, *DEET* N,N-diethyl-meta-toluamide, *IFN- $\gamma$*  interferon- $\gamma$ , *IL* interleukin, *MDA* malondialdehyde, *NF- $\kappa$ B* p65 nuclear factor kappa B p65 subunit, *NLRP3* NOD-, LRR- and pyrin domain-containing protein 3, *PCs* protein carbonyls, *p-JAK-1* phosphorylated Janus kinase-1, *p-STAT-1* phosphorylated signal transducer and activator of transcription-1, *SOD* superoxide dismutase



**Table S2** List of primary and secondary antibodies employed in the study

| <b>Antibodies</b>                                                 | <b>Source</b>                           | <b>Catalog number</b> |
|-------------------------------------------------------------------|-----------------------------------------|-----------------------|
| <b>Primary antibodies</b>                                         |                                         |                       |
| Goat anti-IBA-1                                                   | Abcam, Cambridge, MA, USA               | ab5076                |
| Goat anti-NLRP3                                                   | Abcam, Cambridge, MA, USA               | AB4207                |
| Mouse anti-BrdU                                                   | BD Biosciences, Franklin Lakes, NJ, USA | 347580                |
| Mouse anti-CD68                                                   | Bio-Rad, Hercules, CA, USA              | MCA341R               |
| Mouse anti-ASC                                                    | Santa Cruz, Dallas, TX, USA             | sc-514414             |
| Rabbit anti-GFAP                                                  | Agilent Tech, Santa Clara, CA, USA      | GA52461-2             |
| Rabbit-anti DCX                                                   | Synaptic Systems, Göttingen, Germany    | 326003                |
| Rabbit anti-IBA-1                                                 | Abcam, Cambridge, MA, USA               | AB178846              |
| Rabbit anti-NeuN                                                  | Millipore, St. Louis, MO, USA           | ABN78                 |
| <b>Secondary antibodies</b>                                       |                                         |                       |
| ABC Kit                                                           | Vector Labs, Burlingame, CA, USA        | PK-6100               |
| Goat anti-Rabbit IgG (H + L), Biotinylated                        | Vector Labs, Burlingame, CA, USA        | BA-1000               |
| Donkey anti-goat IgG with Alexa Fluor 488                         | Invitrogen, Waltham, MA, USA            | A11055                |
| Donkey anti-mouse IgG with Alexa Fluor 594                        | Invitrogen, Waltham, MA, USA            | A21203                |
| Donkey anti-rabbit IgG with Alexa Fluor 405                       | Abcam, Cambridge, MA, USA               | AB175651              |
| Donkey anti-mouse IgG with Alexa Fluor 488                        | Invitrogen, Waltham, MA, USA            | A21202                |
| Donkey anti-rabbit with Alexa Fluor 488                           | Invitrogen, Waltham, MA, USA            | A21206                |
| Horse Anti-Goat IgG Antibody (H + L), Biotinylated                | Vector Labs, Burlingame, CA, USA        | BA-9500               |
| Horse Anti-Mouse IgG Antibody, rat adsorbed (H + L), Biotinylated | Vector Labs, Burlingame, CA, USA        | BA-2001               |

*ASC* apoptosis-associated speck-like protein containing a C-terminal caspase recruitment domain, *BrdU* 5'-bromodeoxyuridine, *CD68* cluster of differentiation 68, *DCX* doublecortin, *GFAP* glial fibrillary acidic protein, *IBA-1* ionized calcium-binding adapter molecule 1, *NeuN* neuron specific nuclear antigen, *NLRP3* NOD-, LRR- and pyrin domain-containing protein 3

**Table S3** Statistical data from one-way ANOVA analysis presented in bar charts of different figures

| Experiment                                      | Groups  | Mean    | SEM    | Type of ANOVA                                           | Upper 95%CI | $F(DFn, DFd)/H$          | ANOVA $P$ -Value | Post-hoc $P$ -value                                                                               |
|-------------------------------------------------|---------|---------|--------|---------------------------------------------------------|-------------|--------------------------|------------------|---------------------------------------------------------------------------------------------------|
| <b>Fig. 1b,</b><br>Distance<br>Traveled<br>(cm) | Naïve   | 1893    | 167.4  | One-way<br>ANOVA with<br>Tukey's post<br>hoc tests      | 2247        | $F(2, 49)$<br>$= 2.400$  | $P > 0.05$       | Naïve vs. GWI-VEH: $P > 0.05$<br>GWI-VEH vs. GWI-CBD: $P > 0.05$<br>Naïve vs. GWI-CBD: $P > 0.05$ |
|                                                 | GWI-VEH | 1672    | 187.8  |                                                         | 2070        |                          |                  |                                                                                                   |
|                                                 | GWI-CBD | 1721    | 91.1   |                                                         | 1914        |                          |                  |                                                                                                   |
| <b>Fig. 1b,</b><br>Velocity<br>(cm/s)           | Naïve   | 6.312   | 0.5581 | One-way<br>ANOVA with<br>Tukey's post<br>hoc tests      | 7.489       | $F(2, 49)$<br>$= 0.5715$ | $P > 0.05$       | Naïve vs. GWI-VEH: $P > 0.05$<br>GWI-VEH vs. GWI-CBD: $P > 0.05$<br>Naïve vs. GWI-CBD: $P > 0.05$ |
|                                                 | GWI-VEH | 5.574   | 0.6261 |                                                         | 6.901       |                          |                  |                                                                                                   |
|                                                 | GWI-CBD | 5.737   | 0.3037 |                                                         | 6.381       |                          |                  |                                                                                                   |
| <b>Fig. 2c,</b> DI                              | Naïve   | 0.2085  | 0.1090 | One-way<br>ANOVA with<br>Tukey's post<br>hoc tests      | 0.4409      | $F(2, 41)$<br>$= 4.777$  | $P < 0.05$       | Naïve vs. GWI-VEH: $P < 0.05$<br>GWI-VEH vs. GWI-CBD: $P < 0.05$<br>Naïve vs. GWI-CBD: $P > 0.05$ |
|                                                 | GWI-VEH | -0.1792 | 0.0634 |                                                         | -0.0401     |                          |                  |                                                                                                   |
|                                                 | GWI-CBD | 0.2737  | 0.1302 |                                                         | 0.5531      |                          |                  |                                                                                                   |
| <b>Fig. 2d,</b> T2-<br>TOET (s)                 | Naïve   | 42.43   | 5.299  | Kruskal<br>Wallis test<br>with Dunn's<br>post hoc tests | 53.79       | $H =$<br>5.710           | $P > 0.05$       | Naïve vs. GWI-VEH: $P > 0.05$<br>GWI-VEH vs. GWI-CBD: $P > 0.05$<br>Naïve vs. GWI-CBD: $P > 0.05$ |
|                                                 | GWI-VEH | 49.48   | 7.011  |                                                         | 64.76       |                          |                  |                                                                                                   |
|                                                 | GWI-CBD | 29.72   | 3.909  |                                                         | 38.10       |                          |                  |                                                                                                   |
| <b>Fig. 2d,</b> T3-<br>TOET (s)                 | Naïve   | 41.81   | 3.999  | One-way<br>ANOVA with<br>Tukey's post<br>hoc tests      | 50.39       | $F(2, 40)$<br>$= 0.3498$ | $P > 0.05$       | Naïve vs. GWI-VEH: $P > 0.05$<br>GWI-VEH vs. GWI-CBD: $P > 0.05$<br>Naïve vs. GWI-CBD: $P > 0.05$ |
|                                                 | GWI-VEH | 42.36   | 3.064  |                                                         | 49.04       |                          |                  |                                                                                                   |
|                                                 | GWI-CBD | 37.11   | 6.563  |                                                         | 51.18       |                          |                  |                                                                                                   |
| <b>Fig. 2g,</b> DI                              | Naïve   | 0.2781  | 0.1199 | One-way<br>ANOVA with<br>Tukey's post<br>hoc tests      | 0.5352      | $F(2, 39)$<br>$= 4.815$  | $P < 0.05$       | Naïve vs. GWI-VEH: $P < 0.05$<br>GWI-VEH vs. GWI-CBD: $P < 0.05$<br>Naïve vs. GWI-CBD: $P > 0.05$ |
|                                                 | GWI-VEH | -0.1808 | 0.1014 |                                                         | 0.0401      |                          |                  |                                                                                                   |
|                                                 | GWI-CBD | 0.2639  | 0.1243 |                                                         | 0.5324      |                          |                  |                                                                                                   |

| Experiment                                  | Groups                      | Mean                        | SEM                        | Type of ANOVA                                  | Upper 95%CI                | $F(DFn, DFd)/H$    | ANOVA $P$ -Value | Post-hoc $P$ -value                                                                                 |
|---------------------------------------------|-----------------------------|-----------------------------|----------------------------|------------------------------------------------|----------------------------|--------------------|------------------|-----------------------------------------------------------------------------------------------------|
| <b>Fig. 2h</b> , T2-TOET (s)                | Naïve<br>GWI-VEH<br>GWI-CBD | 45.89<br>51.28<br>47.59     | 3.846<br>8.347<br>5.750    | Kruskal Wallis test with Dunn's post hoc tests | 54.14<br>69.46<br>60.01    | $H = 0.01216$      | $P > 0.05$       | Naïve vs. GWI-VEH: $P > 0.05$<br>GWI-VEH vs. GWI-CBD: $P > 0.05$<br>Naïve vs. GWI-CBD: $P > 0.05$   |
| <b>Fig. 2h</b> , T3-TOET (s)                | Naïve<br>GWI-VEH<br>GWI-CBD | 21.45<br>33.51<br>22.62     | 2.904<br>5.571<br>2.698    | Kruskal Wallis test with Dunn's post hoc tests | 27.67<br>45.65<br>28.45    | $H = 4.948$        | $P > 0.05$       | Naïve vs. GWI-VEH: $P > 0.05$<br>GWI-VEH vs. GWI-CBD: $P > 0.05$<br>Naïve vs. GWI-CBD: $P > 0.05$   |
| <b>Fig. 3c</b> , DI                         | Naïve<br>GWI-VEH<br>GWI-CBD | 0.2152<br>-0.1917<br>0.1645 | 0.1586<br>0.1361<br>0.0871 | One-way ANOVA with Tukey's post hoc tests      | 0.5808<br>0.1049<br>0.3501 | $F(2, 35) = 3.258$ | $P = 0.0504$     | Naïve vs. GWI-VEH: $P > 0.05$<br>GWI-VEH vs. GWI-CBD: $P > 0.05$<br>Naïve vs. GWI-CBD: $P > 0.05$   |
| <b>Fig. 3d</b> , T2-TOET (s)                | Naïve<br>GWI-VEH<br>GWI-CBD | 36.77<br>43.96<br>39.48     | 4.139<br>5.735<br>3.615    | Kruskal Wallis test with Dunn's post hoc tests | 45.79<br>56.58<br>47.19    | $H = 0.7414$       | $P > 0.05$       | Naïve vs. GWI-VEH: $P > 0.05$<br>GWI-VEH vs. GWI-CBD: $P > 0.05$<br>Naïve vs. GWI-CBD: $P > 0.05$   |
| <b>Fig. 3d</b> , T3-TOET (s)                | Naïve<br>GWI-VEH<br>GWI-CBD | 33.84<br>37.64<br>42.26     | 5.417<br>4.422<br>4.190    | Kruskal Wallis test with Dunn's post hoc tests | 46.34<br>47.37<br>51.19    | $H = 2.726$        | $P > 0.05$       | Naïve vs. GWI-VEH: $P > 0.05$<br>GWI-VEH vs. GWI-CBD: $P > 0.05$<br>Naïve vs. GWI-CBD: $P > 0.05$   |
| <b>Fig. 3f</b> , SPR                        | Naïve<br>GWI-VEH<br>GWI-CBD | 74.55<br>50.26<br>64.18     | 1.998<br>2.588<br>4.158    | One-way ANOVA with Tukey's post hoc tests      | 78.77<br>55.78<br>73.04    | $F(2, 47) = 16.87$ | $P < 0.0001$     | Naïve vs. GWI-VEH: $P < 0.0001$<br>GWI-VEH vs. GWI-CBD: $P < 0.01$<br>Naïve vs. GWI-CBD: $P < 0.05$ |
| <b>Fig. 3g</b> , Total volume consumed (ml) | Naïve<br>GWI-VEH<br>GWI-CBD | 16.39<br>16.50<br>13.44     | 0.825<br>1.268<br>1.140    | Kruskal Wallis test with Dunn's post hoc tests | 18.13<br>19.20<br>15.87    | $H = 5.551$        | $P > 0.05$       | Naïve vs. GWI-VEH: $P > 0.05$<br>GWI-VEH vs. GWI-CBD: $P > 0.05$<br>Naïve vs. GWI-CBD: $P > 0.05$   |

| Experiment                                                        | Groups                      | Mean                    | SEM                        | Type of ANOVA                                  | Upper 95%CI             | $F(DFn, DFd)/H$    | ANOVA $P$ -Value | Post-hoc $P$ -value                                                                               |
|-------------------------------------------------------------------|-----------------------------|-------------------------|----------------------------|------------------------------------------------|-------------------------|--------------------|------------------|---------------------------------------------------------------------------------------------------|
| <b>Fig. 3h</b> , Paw withdrawal threshold (mN)                    | Naïve<br>GWI-VEH<br>GWI-CBD | 66.30<br>42.71<br>52.46 | 6.878<br>3.024<br>4.098    | One-way ANOVA with Tukey's post hoc tests      | 81.29<br>49.16<br>61.20 | $F(2, 42) = 6.171$ | $P < 0.01$       | Naïve vs. GWI-VEH: $P < 0.01$<br>GWI-VEH vs. GWI-CBD: $P > 0.05$<br>Naïve vs. GWI-CBD: $P > 0.05$ |
| <b>Fig. 4a</b> , IBA-1 <sup>+</sup> structures AF (DG)            | Naïve<br>GWI-VEH<br>GWI-CBD | 24.78<br>26.90<br>24.93 | 0.9040<br>0.9300<br>0.4864 | One-way ANOVA with Tukey's post hoc tests      | 27.10<br>29.29<br>26.18 | $F(2, 15) = 2.185$ | $P > 0.05$       | Naïve vs. GWI-VEH: $P > 0.05$<br>GWI-VEH vs. GWI-CBD: $P > 0.05$<br>Naïve vs. GWI-CBD: $P > 0.05$ |
| <b>Fig. 4a</b> , IBA-1 <sup>+</sup> structures AF (CA1)           | Naïve<br>GWI-VEH<br>GWI-CBD | 21.68<br>24.71<br>20.66 | 1.0740<br>0.4561<br>0.3507 | One-way ANOVA with Tukey's post hoc tests      | 24.44<br>25.89<br>21.57 | $F(2, 15) = 8.968$ | $P < 0.01$       | Naïve vs. GWI-VEH: $P < 0.05$<br>GWI-VEH vs. GWI-CBD: $P < 0.01$<br>Naïve vs. GWI-CBD: $P > 0.05$ |
| <b>Fig. 4a</b> , IBA-1 <sup>+</sup> structures AF (CA3)           | Naïve<br>GWI-VEH<br>GWI-CBD | 21.81<br>25.32<br>23.09 | 0.9323<br>0.6128<br>0.7174 | One-way ANOVA with Tukey's post hoc tests      | 24.21<br>26.89<br>24.93 | $F(2, 15) = 5.365$ | $P < 0.05$       | Naïve vs. GWI-VEH: $P < 0.05$<br>GWI-VEH vs. GWI-CBD: $P > 0.05$<br>Naïve vs. GWI-CBD: $P > 0.05$ |
| <b>Fig. 4a</b> , IBA-1 <sup>+</sup> structures AF (EH)            | Naïve<br>GWI-VEH<br>GWI-CBD | 22.76<br>25.64<br>22.89 | 0.5299<br>0.3528<br>0.3287 | Kruskal Wallis test with Dunn's post hoc tests | 24.12<br>26.55<br>23.74 | $H = 11.42$        | $P < 0.001$      | Naïve vs. GWI-VEH: $P < 0.05$<br>GWI-VEH vs. GWI-CBD: $P < 0.01$<br>Naïve vs. GWI-CBD: $P > 0.05$ |
| <b>Fig. 4b</b> , % of IBA-1 <sup>+</sup> microglia with CD68 (DG) | Naïve<br>GWI-VEH<br>GWI-CBD | 19.78<br>23.56<br>21.60 | 1.764<br>2.076<br>1.792    | One-way ANOVA with Tukey's post hoc tests      | 24.31<br>28.90<br>26.21 | $F(2, 15) = 1.012$ | $P > 0.05$       | Naïve vs. GWI-VEH: $P > 0.05$<br>GWI-VEH vs. GWI-CBD: $P > 0.05$<br>Naïve vs. GWI-CBD: $P > 0.05$ |

| Experiment                                                         | Groups                      | Mean                       | SEM                              | Type of ANOVA                                  | Upper 95%CI                | $F(DFn, DFd)/H$    | ANOVA $P$ -Value | Post-hoc $P$ -value                                                                                 |
|--------------------------------------------------------------------|-----------------------------|----------------------------|----------------------------------|------------------------------------------------|----------------------------|--------------------|------------------|-----------------------------------------------------------------------------------------------------|
| <b>Fig. 4b</b> , % of IBA-1 <sup>+</sup> microglia with CD68 (CA1) | Naïve<br>GWI-VEH<br>GWI-CBD | 17.68<br>24.71<br>19.33    | 1.2390<br>0.4561<br>0.9832       | One-way ANOVA with Tukey's post hoc tests      | 20.87<br>25.89<br>21.86    | $F(2, 15) = 14.98$ | $P < 0.001$      | Naïve vs. GWI-VEH: $P < 0.001$<br>GWI-VEH vs. GWI-CBD: $P < 0.01$<br>Naïve vs. GWI-CBD: $P > 0.05$  |
| <b>Fig. 4b</b> , % of IBA-1 <sup>+</sup> microglia with CD68 (CA3) | Naïve<br>GWI-VEH<br>GWI-CBD | 17.65<br>25.48<br>20.25    | 1.560<br>1.029<br>1.604          | Kruskal Wallis test with Dunn's post hoc tests | 21.65<br>28.13<br>24.38    | $H = 8.924$        | $P < 0.01$       | Naïve vs. GWI-VEH: $P < 0.05$<br>GWI-VEH vs. GWI-CBD: $P > 0.05$<br>Naïve vs. GWI-CBD: $P > 0.05$   |
| <b>Fig. 4b</b> , % of IBA-1 <sup>+</sup> microglia with CD68 (EH)  | Naïve<br>GWI-VEH<br>GWI-CBD | 18.37<br>24.59<br>20.39    | 1.0050<br>0.4925<br>0.4368       | One-way ANOVA with Tukey's post hoc tests      | 20.95<br>25.85<br>21.52    | $F(2, 15) = 20.91$ | $P < 0.0001$     | Naïve vs. GWI-VEH: $P < 0.0001$<br>GWI-VEH vs. GWI-CBD: $P < 0.01$<br>Naïve vs. GWI-CBD: $P > 0.05$ |
| <b>Fig. 5a</b> , Number of inflammasomes (per unit area in CA3)    | Naïve<br>GWI-VEH<br>GWI-CBD | 1.000<br>8.004<br>2.060    | 0.4472<br>1.4210<br>0.4501       | One-way ANOVA with Tukey's post hoc tests      | 2.242<br>11.950<br>3.310   | $F(2, 12) = 17.65$ | $P < 0.001$      | Naïve vs. GWI-VEH: $P < 0.001$<br>GWI-VEH vs. GWI-CBD: $P < 0.01$<br>Naïve vs. GWI-CBD: $P > 0.05$  |
| <b>Fig. 5a</b> , % of microglia with inflammasomes (CA3)           | Naïve<br>GWI-VEH<br>GWI-CBD | 4.83<br>42.91<br>15.73     | 2.177<br>5.842<br>2.927          | One-way ANOVA with Tukey's post hoc tests      | 10.88<br>59.13<br>23.86    | $F(2, 12) = 24.32$ | $P < 0.0001$     | Naïve vs. GWI-VEH: $P < 0.0001$<br>GWI-VEH vs. GWI-CBD: $P < 0.01$<br>Naïve vs. GWI-CBD: $P > 0.05$ |
| <b>Fig. 5b</b> , NF- $\kappa$ B p65 (OD450)                        | Naïve<br>GWI-VEH<br>GWI-CBD | 0.0989<br>0.1317<br>0.1116 | 0.005656<br>0.009403<br>0.004609 | One-way ANOVA with Tukey's post hoc tests      | 0.1134<br>0.1559<br>0.1234 | $F(2, 15) = 5.818$ | $P < 0.05$       | Naïve vs. GWI-VEH: $P < 0.05$<br>GWI-VEH vs. GWI-CBD: $P > 0.05$<br>Naïve vs. GWI-CBD: $P > 0.05$   |

| Experiment                                                     | Groups                      | Mean                       | SEM                           | Type of ANOVA                                           | Upper 95%CI                | <i>F</i> (DFn, DFd)/ <i>H</i> | ANOVA <i>P</i> -Value | Post-hoc <i>P</i> -value                                                                                          |
|----------------------------------------------------------------|-----------------------------|----------------------------|-------------------------------|---------------------------------------------------------|----------------------------|-------------------------------|-----------------------|-------------------------------------------------------------------------------------------------------------------|
| <b>Fig. 5b,</b><br>NLRP3<br>(ng/mg<br>protein)                 | Naïve<br>GWI-VEH<br>GWI-CBD | 0.3915<br>0.7291<br>0.5690 | 0.04023<br>0.09806<br>0.03162 | Kruskal<br>Wallis test<br>with Dunn's<br>post hoc tests | 0.4949<br>0.9812<br>0.6503 | <i>H</i> =<br>10.67           | <i>P</i> < 0.01       | Naïve vs. GWI-VEH: <i>P</i> < 0.01<br>GWI-VEH vs. GWI-CBD: <i>P</i> > 0.05<br>Naïve vs. GWI-CBD: <i>P</i> > 0.05  |
| <b>Fig. 5b,</b> ASC<br>(pg/mg<br>protein)                      | Naïve<br>GWI-VEH<br>GWI-CBD | 17.93<br>43.86<br>20.90    | 2.796<br>2.666<br>4.899       | One-way<br>ANOVA with<br>Tukey's post<br>hoc tests      | 25.11<br>50.72<br>33.49    | <i>F</i> (2, 15)<br>= 15.53   | <i>P</i> < 0.001      | Naïve vs. GWI-VEH: <i>P</i> < 0.001<br>GWI-VEH vs. GWI-CBD: <i>P</i> < 0.01<br>Naïve vs. GWI-CBD: <i>P</i> > 0.05 |
| <b>Fig. 5b,</b><br>Cleaved<br>caspase-1<br>(RFU/mg<br>protein) | Naïve<br>GWI-VEH<br>GWI-CBD | 14484<br>23361<br>19462    | 1411<br>3231<br>1513          | Kruskal<br>Wallis test<br>with Dunn's<br>post hoc tests | 18111<br>31667<br>23352    | <i>H</i> =<br>8.222           | <i>P</i> < 0.01       | Naïve vs. GWI-VEH: <i>P</i> < 0.05<br>GWI-VEH vs. GWI-CBD: <i>P</i> > 0.05<br>Naïve vs. GWI-CBD: <i>P</i> > 0.05  |
| <b>Fig. 5b,</b> IL-<br>1β (pg/mg<br>protein)                   | Naïve<br>GWI-VEH<br>GWI-CBD | 428.3<br>641.1<br>455.9    | 31.72<br>76.02<br>82.13       | Kruskal<br>Wallis test<br>with Dunn's<br>post hoc tests | 509.8<br>836.5<br>667.0    | <i>H</i> =<br>7.404           | <i>P</i> < 0.05       | Naïve vs. GWI-VEH: <i>P</i> > 0.05<br>GWI-VEH vs. GWI-CBD: <i>P</i> < 0.05<br>Naïve vs. GWI-CBD: <i>P</i> > 0.05  |
| <b>Fig. 5b,</b> IL-<br>18 (pg/mg<br>protein)                   | Naïve<br>GWI-VEH<br>GWI-CBD | 1496<br>2274<br>1814       | 85.84<br>185.60<br>93.12      | One-way<br>ANOVA with<br>Tukey's post<br>hoc tests      | 1717<br>2751<br>2053       | <i>F</i> (2, 15)<br>= 9.080   | <i>P</i> < 0.01       | Naïve vs. GWI-VEH: <i>P</i> < 0.01<br>GWI-VEH vs. GWI-CBD: <i>P</i> > 0.05<br>Naïve vs. GWI-CBD: <i>P</i> > 0.05  |
| <b>Fig. 5c,</b><br>MDA<br>(μmol/mg<br>protein)                 | Naïve<br>GWI-VEH<br>GWI-CBD | 3.240<br>12.640<br>7.221   | 1.050<br>1.566<br>1.566       | One-way<br>ANOVA with<br>Tukey's post<br>hoc tests      | 5.940<br>16.67<br>10.79    | <i>F</i> (2, 15)<br>= 12.19   | <i>P</i> < 0.001      | Naïve vs. GWI-VEH: <i>P</i> < 0.001<br>GWI-VEH vs. GWI-CBD: <i>P</i> < 0.05<br>Naïve vs. GWI-CBD: <i>P</i> > 0.05 |

| Experiment                                     | Groups                      | Mean                       | SEM                              | Type of ANOVA                                  | Upper 95%CI                | <i>F</i> (DFn, DFd)/ <i>H</i> | ANOVA <i>P</i> -Value | Post-hoc <i>P</i> -value                                                                                         |
|------------------------------------------------|-----------------------------|----------------------------|----------------------------------|------------------------------------------------|----------------------------|-------------------------------|-----------------------|------------------------------------------------------------------------------------------------------------------|
| <b>Fig. 5c</b> , PCs (nmol/mg protein)         | Naïve<br>GWI-VEH<br>GWI-CBD | 16.95<br>26.50<br>15.80    | 3.175<br>3.134<br>2.043          | Kruskal Wallis test with Dunn's post hoc tests | 25.11<br>34.55<br>21.05    | <i>H</i> = 7.064              | <i>P</i> < 0.05       | Naïve vs. GWI-VEH: <i>P</i> > 0.05<br>GWI-VEH vs. GWI-CBD: <i>P</i> < 0.05<br>Naïve vs. GWI-CBD: <i>P</i> > 0.05 |
| <b>Fig. 5c</b> , SOD (U/mg protein)            | Naïve<br>GWI-VEH<br>GWI-CBD | 0.9624<br>0.7438<br>0.9665 | 0.1648<br>0.0688<br>0.1105       | Kruskal Wallis test with Dunn's post hoc tests | 1.386<br>0.921<br>1.251    | <i>H</i> = 3.193              | <i>P</i> > 0.05       | Naïve vs. GWI-VEH: <i>P</i> > 0.05<br>GWI-VEH vs. GWI-CBD: <i>P</i> > 0.05<br>Naïve vs. GWI-CBD: <i>P</i> > 0.05 |
| <b>Fig. 5c</b> , CAT (nmol/min/mg protein)     | Naïve<br>GWI-VEH<br>GWI-CBD | 10.290<br>6.627<br>8.370   | 0.9703<br>1.0980<br>0.4650       | One-way ANOVA with Tukey's post hoc tests      | 12.780<br>9.451<br>9.565   | <i>F</i> (2, 15) = 4.259      | <i>P</i> < 0.05       | Naïve vs. GWI-VEH: <i>P</i> < 0.05<br>GWI-VEH vs. GWI-CBD: <i>P</i> > 0.05<br>Naïve vs. GWI-CBD: <i>P</i> > 0.05 |
| <b>Fig. 6a</b> , IL-6 (pg/mg protein)          | Naïve<br>GWI-VEH<br>GWI-CBD | 70.13<br>99.45<br>89.26    | 2.866<br>13.210<br>8.207         | Kruskal Wallis test with Dunn's post hoc tests | 77.5<br>133.4<br>110.4     | <i>H</i> = 7.170              | <i>P</i> < 0.05       | Naïve vs. GWI-VEH: <i>P</i> < 0.05<br>GWI-VEH vs. GWI-CBD: <i>P</i> > 0.05<br>Naïve vs. GWI-CBD: <i>P</i> > 0.05 |
| <b>Fig. 6a</b> , IFN- $\gamma$ (pg/mg protein) | Naïve<br>GWI-VEH<br>GWI-CBD | 4364<br>8244<br>6478       | 502.5<br>851.0<br>627.7          | One-way ANOVA with Tukey's post hoc tests      | 5656<br>10431<br>8091      | <i>F</i> (2, 15) = 8.255      | <i>P</i> < 0.01       | Naïve vs. GWI-VEH: <i>P</i> < 0.01<br>GWI-VEH vs. GWI-CBD: <i>P</i> > 0.05<br>Naïve vs. GWI-CBD: <i>P</i> > 0.05 |
| <b>Fig. 6b</b> , p-JAK-1 (OD450)               | Naïve<br>GWI-VEH<br>GWI-CBD | 0.1514<br>0.1956<br>0.1675 | 0.006179<br>0.009900<br>0.005661 | One-way ANOVA with Tukey's post hoc tests      | 0.1673<br>0.2211<br>0.1821 | <i>F</i> (2, 15) = 8.935      | <i>P</i> < 0.01       | Naïve vs. GWI-VEH: <i>P</i> < 0.01<br>GWI-VEH vs. GWI-CBD: <i>P</i> < 0.05<br>Naïve vs. GWI-CBD: <i>P</i> > 0.05 |
| <b>Fig. 6b</b> , p-STAT-1 (OD450)              | Naïve<br>GWI-VEH<br>GWI-CBD | 0.1584<br>0.2324<br>0.1848 | 0.00792<br>0.02502<br>0.01094    | Kruskal Wallis test with Dunn's post hoc tests | 0.1788<br>0.2967<br>0.2130 | <i>H</i> = 9.836              | <i>P</i> < 0.01       | Naïve vs. GWI-VEH: <i>P</i> < 0.01<br>GWI-VEH vs. GWI-CBD: <i>P</i> > 0.05<br>Naïve vs. GWI-CBD: <i>P</i> > 0.05 |

| Experiment                                                            | Groups                      | Mean                    | SEM                        | Type of ANOVA                                           | Upper 95%CI             | <i>F</i> (DFn, DFd)/ <i>H</i> | ANOVA <i>P</i> -Value | Post-hoc <i>P</i> -value                                                                                             |
|-----------------------------------------------------------------------|-----------------------------|-------------------------|----------------------------|---------------------------------------------------------|-------------------------|-------------------------------|-----------------------|----------------------------------------------------------------------------------------------------------------------|
| <b>Fig. 6c,</b><br>Anandamide<br>(ng/mg<br>protein)                   | Naïve<br>GWI-VEH<br>GWI-CBD | 4.491<br>4.169<br>5.304 | 0.2690<br>0.4819<br>0.4627 | One-way<br>ANOVA with<br>Tukey's post<br>hoc tests      | 5.182<br>5.408<br>6.493 | <i>F</i> (2, 15)<br>= 1.978   | <i>P</i> > 0.05       | Naïve vs. GWI-VEH: <i>P</i> > 0.05<br>GWI-VEH vs. GWI-CBD: <i>P</i> > 0.05<br>Naïve vs. GWI-CBD: <i>P</i> > 0.05     |
| <b>Fig. 7,</b> AF of<br>astrocytic<br>elements<br>(DG)                | Naïve<br>GWI-VEH<br>GWI-CBD | 18.10<br>21.18<br>20.09 | 0.7484<br>0.6427<br>0.6132 | Kruskal<br>Wallis test<br>with Dunn's<br>post hoc tests | 20.02<br>22.96<br>22.67 | <i>H</i> =<br>5.786           | <i>P</i> < 0.05       | Naïve vs. GWI-VEH: <i>P</i> > 0.05<br>GWI-VEH vs. GWI-CBD: <i>P</i> > 0.05<br>Naïve vs. GWI-CBD: <i>P</i> > 0.05     |
| <b>Fig. 7,</b> AF of<br>astrocytic<br>elements<br>(CA1)               | Naïve<br>GWI-VEH<br>GWI-CBD | 17.54<br>21.56<br>19.86 | 0.9084<br>0.8305<br>0.7179 | One-way<br>ANOVA with<br>Tukey's post<br>hoc tests      | 19.87<br>23.87<br>21.70 | <i>F</i> (2, 14)<br>= 5.852   | <i>P</i> < 0.05       | Naïve vs. GWI-VEH: <i>P</i> < 0.05<br>GWI-VEH vs. GWI-CBD: <i>P</i> > 0.05<br>Naïve vs. GWI-CBD: <i>P</i> > 0.05     |
| <b>Fig. 7,</b> AF of<br>astrocytic<br>elements<br>(CA3)               | Naïve<br>GWI-VEH<br>GWI-CBD | 17.85<br>22.23<br>19.95 | 0.2847<br>0.9257<br>0.8933 | One-way<br>ANOVA with<br>Tukey's post<br>hoc tests      | 18.59<br>24.80<br>22.25 | <i>F</i> (2, 14)<br>= 8.422   | <i>P</i> < 0.01       | Naïve vs. GWI-VEH: <i>P</i> < 0.01<br>GWI-VEH vs. GWI-CBD: <i>P</i> > 0.05<br>Naïve vs. GWI-CBD: <i>P</i> > 0.05     |
| <b>Fig. 7,</b> AF of<br>astrocytic<br>elements<br>(EH)                | Naïve<br>GWI-VEH<br>GWI-CBD | 17.83<br>21.50<br>20.27 | 0.5707<br>0.7558<br>0.5435 | Kruskal<br>Wallis test<br>with Dunn's<br>post hoc tests | 19.30<br>23.59<br>21.67 | <i>H</i> =<br>10.35           | <i>P</i> < 0.01       | Naïve vs. GWI-VEH: <i>P</i> < 0.01<br>GWI-VEH vs. GWI-CBD: <i>P</i> > 0.05<br>Naïve vs. GWI-CBD: <i>P</i> > 0.05     |
| <b>Fig. 8a,</b><br>BrdU <sup>+</sup> cells<br>in SGZ-GCL              | Naïve<br>GWI-VEH<br>GWI-CBD | 3082<br>1600<br>2098    | 70.95<br>89.39<br>60.45    | One-way<br>ANOVA with<br>Tukey's post<br>hoc tests      | 3279<br>1848<br>2266    | <i>F</i> (2, 12)<br>= 102.3   | <i>P</i> <<br>0.0001  | Naïve vs. GWI-VEH: <i>P</i> < 0.0001<br>GWI-VEH vs. GWI-CBD: <i>P</i> < 0.01<br>Naïve vs. GWI-CBD: <i>P</i> < 0.0001 |
| <b>Fig. 8b,</b> % of<br>BrdU <sup>+</sup> cells<br>expressing<br>NeuN | Naïve<br>GWI-VEH<br>GWI-CBD | 85.40<br>78.80<br>86.00 | 2.821<br>4.042<br>2.168    | One-way<br>ANOVA with<br>Tukey's post<br>hoc tests      | 93.23<br>90.02<br>92.02 | <i>F</i> (2, 12)<br>= 1.651   | <i>P</i> > 0.05       | Naïve vs. GWI-VEH: <i>P</i> > 0.05<br>GWI-VEH vs. GWI-CBD: <i>P</i> > 0.05<br>Naïve vs. GWI-CBD: <i>P</i> > 0.05     |



| Experiment                                          | Groups  | Mean | SEM    | Type of ANOVA                             | Upper 95%CI | F(DFn, DFd)/H      | ANOVA P-Value | Post-hoc P-value                                                                                      |
|-----------------------------------------------------|---------|------|--------|-------------------------------------------|-------------|--------------------|---------------|-------------------------------------------------------------------------------------------------------|
| <b>Fig. 8c,</b> Net neurogenesis                    | Naïve   | 2633 | 112.00 | One-way ANOVA with Tukey's post hoc tests | 2944        | $F(2, 12) = 57.55$ | $P < 0.0001$  | Naïve vs. GWI-VEH: $P < 0.0001$<br>GWI-VEH vs. GWI-CBD: $P < 0.01$<br>Naïve vs. GWI-CBD: $P < 0.0001$ |
|                                                     | GWI-VEH | 1258 | 91.30  |                                           | 1512        |                    |               |                                                                                                       |
|                                                     | GWI-CBD | 1804 | 64.06  |                                           | 1981        |                    |               |                                                                                                       |
| <b>Fig. 8d,</b> DCX <sup>+</sup> neurons in SGZ-GCL | Naïve   | 7543 | 852.0  | One-way ANOVA with Tukey's post hoc tests | 9733        | $F(2, 15) = 9.199$ | $P < 0.01$    | Naïve vs. GWI-VEH: $P < 0.01$<br>GWI-VEH vs. GWI-CBD: $P > 0.05$<br>Naïve vs. GWI-CBD: $P > 0.05$     |
|                                                     | GWI-VEH | 4027 | 457.5  |                                           | 5203        |                    |               |                                                                                                       |
|                                                     | GWI-CBD | 5715 | 270.7  |                                           | 6411        |                    |               |                                                                                                       |

*GWI* Gulf War Illness, *VEH* vehicle, *CBD* cannabidiol, *BrdU* 5'-bromodeoxyuridine, *NeuN* neuron-specific nuclear antigen, *DCX* doublecortin, *GCL* granule cell layer, *SGZ* subgranular zone, *ASC* apoptosis associated speck-like protein containing a C-terminal caspase recruitment domain, *CAT* catalase, *IFN-γ* interferon-γ, *IL* interleukin, *MDA* malondialdehyde, *NF-κB* p65 nuclear factor kappa B p65 subunit, *NLRP3* NOD-, LRR- and pyrin domain-containing protein 3, *PCs* protein carbonyls, *p-JAK-1* phosphorylated Janus kinase-1, *p-STAT-1* phosphorylated signal transducer and activator of transcription-1, *SOD* superoxide dismutase

**Table S4** Statistical data from unpaired, two-tailed, *t*-tests presented in bar charts of different figures

| Experiment                                               | Parameters | Mean  | SEM    | Upper 95%CI | <i>t</i> , df/U           | <i>F</i> , DF <sub>n</sub> , DF <sub>d</sub> | <i>P</i> -value   |                                                          |          |       |        |       |                           |               |                   |          |       |        |       |                                                          |          |       |        |       |                           |               |                   |          |       |        |       |                                                          |          |       |        |       |                           |               |                   |          |       |        |       |                                                          |          |       |        |       |                           |               |                   |          |       |        |       |                                                          |          |       |        |       |                           |               |                   |          |       |        |       |                                                          |          |       |        |       |                           |               |                   |          |       |        |       |                                                          |          |       |        |       |                           |               |                   |          |       |        |       |                                                          |          |       |        |       |                           |               |                   |          |       |        |       |                                                          |       |      |        |      |       |   |                   |
|----------------------------------------------------------|------------|-------|--------|-------------|---------------------------|----------------------------------------------|-------------------|----------------------------------------------------------|----------|-------|--------|-------|---------------------------|---------------|-------------------|----------|-------|--------|-------|----------------------------------------------------------|----------|-------|--------|-------|---------------------------|---------------|-------------------|----------|-------|--------|-------|----------------------------------------------------------|----------|-------|--------|-------|---------------------------|---------------|-------------------|----------|-------|--------|-------|----------------------------------------------------------|----------|-------|--------|-------|---------------------------|---------------|-------------------|----------|-------|--------|-------|----------------------------------------------------------|----------|-------|--------|-------|---------------------------|---------------|-------------------|----------|-------|--------|-------|----------------------------------------------------------|----------|-------|--------|-------|---------------------------|---------------|-------------------|----------|-------|--------|-------|----------------------------------------------------------|----------|-------|--------|-------|---------------------------|---------------|-------------------|----------|-------|--------|-------|----------------------------------------------------------|----------|-------|--------|-------|---------------------------|---------------|-------------------|----------|-------|--------|-------|----------------------------------------------------------|-------|------|--------|------|-------|---|-------------------|
| <b>Fig. 2b</b> , Naïve,<br>Percentage of TOET            | OIFP       | 38.01 | 5.350  | 49.49       | <i>t</i> = 3.177, df = 28 | 1.002, 14, 14                                | <i>P</i> < 0.01   |                                                          |          |       |        |       |                           |               |                   |          |       |        |       |                                                          |          |       |        |       |                           |               |                   |          |       |        |       |                                                          |          |       |        |       |                           |               |                   |          |       |        |       |                                                          |          |       |        |       |                           |               |                   |          |       |        |       |                                                          |          |       |        |       |                           |               |                   |          |       |        |       |                                                          |          |       |        |       |                           |               |                   |          |       |        |       |                                                          |          |       |        |       |                           |               |                   |          |       |        |       |                                                          |          |       |        |       |                           |               |                   |          |       |        |       |                                                          |       |      |        |      |       |   |                   |
|                                                          | OINP       | 62.06 | 5.356  | 73.55       |                           |                                              |                   | <b>Fig. 2b</b> , GWI-VEH,<br>Percentage of TOET          | OIFP     | 56.69 | 3.670  | 64.68 | <i>t</i> = 2.559, df = 24 | 1.005, 12, 12 | <i>P</i> < 0.05   | OINP     | 43.38 | 3.680  | 51.40 | <b>Fig. 2b</b> , GWI-CBD,<br>Percentage of TOET          | OIFP     | 36.64 | 6.513  | 50.61 | <i>t</i> = 2.899, df = 28 | 1.001, 14, 14 | <i>P</i> < 0.01   | OINP     | 63.35 | 6.518  | 77.33 | <b>Fig. 2f</b> , Naïve,<br>Percentage of TOET            | OIFP     | 37.50 | 6.695  | 51.86 | <i>t</i> = 2.653, df = 28 | 1.003, 14, 14 | <i>P</i> < 0.05   | OINP     | 62.59 | 6.685  | 76.93 | <b>Fig. 2f</b> , GWI-VEH,<br>Percentage of TOET          | OIFP     | 56.69 | 6.031  | 69.83 | <i>t</i> = 1.580, df = 24 | 1.003, 12, 12 | <i>P</i> > 0.05   | OINP     | 43.23 | 6.022  | 56.35 | <b>Fig. 2f</b> , GWI-CBD<br>Percentage of TOET           | OIFP     | 36.78 | 6.222  | 50.22 | <i>t</i> = 3.003, df = 26 | 1.004, 13, 13 | <i>P</i> < 0.01   | OINP     | 63.17 | 6.209  | 76.58 | <b>Fig. 3b</b> , Naïve,<br>Percentage of TOET            | FO on P2 | 33.73 | 5.064  | 45.41 | <i>t</i> = 4.529, df = 16 | 1.008, 8, 8   | <i>P</i> < 0.001  | NO on P2 | 66.22 | 5.083  | 77.95 | <b>Fig. 3b</b> , GWI-VEH,<br>Percentage of TOET          | FO on P2 | 59.87 | 7.388  | 76.13 | <i>t</i> = 1.887, df = 22 | 1.002, 11, 11 | <i>P</i> > 0.05   | NO on P2 | 40.14 | 7.395  | 56.42 | <b>Fig. 3b</b> , GWI-CBD,<br>Percentage of TOET          | FO on P2 | 41.80 | 4.356  | 51.08 | <i>t</i> = 2.672, df = 30 | 1.002, 15, 15 | <i>P</i> < 0.05   | NO on P2 | 58.25 | 4.351  | 67.53 | <b>Fig. 3e</b> , Naïve,<br>Total volume consumed<br>(ml) | Water | 4.33 | 0.4354 | 5.25 | U = 5 | - | <i>P</i> < 0.0001 |
| <b>Fig. 2b</b> , GWI-VEH,<br>Percentage of TOET          | OIFP       | 56.69 | 3.670  | 64.68       | <i>t</i> = 2.559, df = 24 | 1.005, 12, 12                                | <i>P</i> < 0.05   |                                                          |          |       |        |       |                           |               |                   |          |       |        |       |                                                          |          |       |        |       |                           |               |                   |          |       |        |       |                                                          |          |       |        |       |                           |               |                   |          |       |        |       |                                                          |          |       |        |       |                           |               |                   |          |       |        |       |                                                          |          |       |        |       |                           |               |                   |          |       |        |       |                                                          |          |       |        |       |                           |               |                   |          |       |        |       |                                                          |          |       |        |       |                           |               |                   |          |       |        |       |                                                          |          |       |        |       |                           |               |                   |          |       |        |       |                                                          |       |      |        |      |       |   |                   |
|                                                          | OINP       | 43.38 | 3.680  | 51.40       |                           |                                              |                   | <b>Fig. 2b</b> , GWI-CBD,<br>Percentage of TOET          | OIFP     | 36.64 | 6.513  | 50.61 | <i>t</i> = 2.899, df = 28 | 1.001, 14, 14 | <i>P</i> < 0.01   | OINP     | 63.35 | 6.518  | 77.33 | <b>Fig. 2f</b> , Naïve,<br>Percentage of TOET            | OIFP     | 37.50 | 6.695  | 51.86 | <i>t</i> = 2.653, df = 28 | 1.003, 14, 14 | <i>P</i> < 0.05   | OINP     | 62.59 | 6.685  | 76.93 | <b>Fig. 2f</b> , GWI-VEH,<br>Percentage of TOET          | OIFP     | 56.69 | 6.031  | 69.83 | <i>t</i> = 1.580, df = 24 | 1.003, 12, 12 | <i>P</i> > 0.05   | OINP     | 43.23 | 6.022  | 56.35 | <b>Fig. 2f</b> , GWI-CBD<br>Percentage of TOET           | OIFP     | 36.78 | 6.222  | 50.22 | <i>t</i> = 3.003, df = 26 | 1.004, 13, 13 | <i>P</i> < 0.01   | OINP     | 63.17 | 6.209  | 76.58 | <b>Fig. 3b</b> , Naïve,<br>Percentage of TOET            | FO on P2 | 33.73 | 5.064  | 45.41 | <i>t</i> = 4.529, df = 16 | 1.008, 8, 8   | <i>P</i> < 0.001  | NO on P2 | 66.22 | 5.083  | 77.95 | <b>Fig. 3b</b> , GWI-VEH,<br>Percentage of TOET          | FO on P2 | 59.87 | 7.388  | 76.13 | <i>t</i> = 1.887, df = 22 | 1.002, 11, 11 | <i>P</i> > 0.05   | NO on P2 | 40.14 | 7.395  | 56.42 | <b>Fig. 3b</b> , GWI-CBD,<br>Percentage of TOET          | FO on P2 | 41.80 | 4.356  | 51.08 | <i>t</i> = 2.672, df = 30 | 1.002, 15, 15 | <i>P</i> < 0.05   | NO on P2 | 58.25 | 4.351  | 67.53 | <b>Fig. 3e</b> , Naïve,<br>Total volume consumed<br>(ml) | Water    | 4.33  | 0.4354 | 5.25  | U = 5                     | -             | <i>P</i> < 0.0001 | Sucrose  | 12.39 | 0.7718 | 14.02 |                                                          |       |      |        |      |       |   |                   |
| <b>Fig. 2b</b> , GWI-CBD,<br>Percentage of TOET          | OIFP       | 36.64 | 6.513  | 50.61       | <i>t</i> = 2.899, df = 28 | 1.001, 14, 14                                | <i>P</i> < 0.01   |                                                          |          |       |        |       |                           |               |                   |          |       |        |       |                                                          |          |       |        |       |                           |               |                   |          |       |        |       |                                                          |          |       |        |       |                           |               |                   |          |       |        |       |                                                          |          |       |        |       |                           |               |                   |          |       |        |       |                                                          |          |       |        |       |                           |               |                   |          |       |        |       |                                                          |          |       |        |       |                           |               |                   |          |       |        |       |                                                          |          |       |        |       |                           |               |                   |          |       |        |       |                                                          |          |       |        |       |                           |               |                   |          |       |        |       |                                                          |       |      |        |      |       |   |                   |
|                                                          | OINP       | 63.35 | 6.518  | 77.33       |                           |                                              |                   | <b>Fig. 2f</b> , Naïve,<br>Percentage of TOET            | OIFP     | 37.50 | 6.695  | 51.86 | <i>t</i> = 2.653, df = 28 | 1.003, 14, 14 | <i>P</i> < 0.05   | OINP     | 62.59 | 6.685  | 76.93 | <b>Fig. 2f</b> , GWI-VEH,<br>Percentage of TOET          | OIFP     | 56.69 | 6.031  | 69.83 | <i>t</i> = 1.580, df = 24 | 1.003, 12, 12 | <i>P</i> > 0.05   | OINP     | 43.23 | 6.022  | 56.35 | <b>Fig. 2f</b> , GWI-CBD<br>Percentage of TOET           | OIFP     | 36.78 | 6.222  | 50.22 | <i>t</i> = 3.003, df = 26 | 1.004, 13, 13 | <i>P</i> < 0.01   | OINP     | 63.17 | 6.209  | 76.58 | <b>Fig. 3b</b> , Naïve,<br>Percentage of TOET            | FO on P2 | 33.73 | 5.064  | 45.41 | <i>t</i> = 4.529, df = 16 | 1.008, 8, 8   | <i>P</i> < 0.001  | NO on P2 | 66.22 | 5.083  | 77.95 | <b>Fig. 3b</b> , GWI-VEH,<br>Percentage of TOET          | FO on P2 | 59.87 | 7.388  | 76.13 | <i>t</i> = 1.887, df = 22 | 1.002, 11, 11 | <i>P</i> > 0.05   | NO on P2 | 40.14 | 7.395  | 56.42 | <b>Fig. 3b</b> , GWI-CBD,<br>Percentage of TOET          | FO on P2 | 41.80 | 4.356  | 51.08 | <i>t</i> = 2.672, df = 30 | 1.002, 15, 15 | <i>P</i> < 0.05   | NO on P2 | 58.25 | 4.351  | 67.53 | <b>Fig. 3e</b> , Naïve,<br>Total volume consumed<br>(ml) | Water    | 4.33  | 0.4354 | 5.25  | U = 5                     | -             | <i>P</i> < 0.0001 | Sucrose  | 12.39 | 0.7718 | 14.02 |                                                          |          |       |        |       |                           |               |                   |          |       |        |       |                                                          |       |      |        |      |       |   |                   |
| <b>Fig. 2f</b> , Naïve,<br>Percentage of TOET            | OIFP       | 37.50 | 6.695  | 51.86       | <i>t</i> = 2.653, df = 28 | 1.003, 14, 14                                | <i>P</i> < 0.05   |                                                          |          |       |        |       |                           |               |                   |          |       |        |       |                                                          |          |       |        |       |                           |               |                   |          |       |        |       |                                                          |          |       |        |       |                           |               |                   |          |       |        |       |                                                          |          |       |        |       |                           |               |                   |          |       |        |       |                                                          |          |       |        |       |                           |               |                   |          |       |        |       |                                                          |          |       |        |       |                           |               |                   |          |       |        |       |                                                          |          |       |        |       |                           |               |                   |          |       |        |       |                                                          |          |       |        |       |                           |               |                   |          |       |        |       |                                                          |       |      |        |      |       |   |                   |
|                                                          | OINP       | 62.59 | 6.685  | 76.93       |                           |                                              |                   | <b>Fig. 2f</b> , GWI-VEH,<br>Percentage of TOET          | OIFP     | 56.69 | 6.031  | 69.83 | <i>t</i> = 1.580, df = 24 | 1.003, 12, 12 | <i>P</i> > 0.05   | OINP     | 43.23 | 6.022  | 56.35 | <b>Fig. 2f</b> , GWI-CBD<br>Percentage of TOET           | OIFP     | 36.78 | 6.222  | 50.22 | <i>t</i> = 3.003, df = 26 | 1.004, 13, 13 | <i>P</i> < 0.01   | OINP     | 63.17 | 6.209  | 76.58 | <b>Fig. 3b</b> , Naïve,<br>Percentage of TOET            | FO on P2 | 33.73 | 5.064  | 45.41 | <i>t</i> = 4.529, df = 16 | 1.008, 8, 8   | <i>P</i> < 0.001  | NO on P2 | 66.22 | 5.083  | 77.95 | <b>Fig. 3b</b> , GWI-VEH,<br>Percentage of TOET          | FO on P2 | 59.87 | 7.388  | 76.13 | <i>t</i> = 1.887, df = 22 | 1.002, 11, 11 | <i>P</i> > 0.05   | NO on P2 | 40.14 | 7.395  | 56.42 | <b>Fig. 3b</b> , GWI-CBD,<br>Percentage of TOET          | FO on P2 | 41.80 | 4.356  | 51.08 | <i>t</i> = 2.672, df = 30 | 1.002, 15, 15 | <i>P</i> < 0.05   | NO on P2 | 58.25 | 4.351  | 67.53 | <b>Fig. 3e</b> , Naïve,<br>Total volume consumed<br>(ml) | Water    | 4.33  | 0.4354 | 5.25  | U = 5                     | -             | <i>P</i> < 0.0001 | Sucrose  | 12.39 | 0.7718 | 14.02 |                                                          |          |       |        |       |                           |               |                   |          |       |        |       |                                                          |          |       |        |       |                           |               |                   |          |       |        |       |                                                          |       |      |        |      |       |   |                   |
| <b>Fig. 2f</b> , GWI-VEH,<br>Percentage of TOET          | OIFP       | 56.69 | 6.031  | 69.83       | <i>t</i> = 1.580, df = 24 | 1.003, 12, 12                                | <i>P</i> > 0.05   |                                                          |          |       |        |       |                           |               |                   |          |       |        |       |                                                          |          |       |        |       |                           |               |                   |          |       |        |       |                                                          |          |       |        |       |                           |               |                   |          |       |        |       |                                                          |          |       |        |       |                           |               |                   |          |       |        |       |                                                          |          |       |        |       |                           |               |                   |          |       |        |       |                                                          |          |       |        |       |                           |               |                   |          |       |        |       |                                                          |          |       |        |       |                           |               |                   |          |       |        |       |                                                          |          |       |        |       |                           |               |                   |          |       |        |       |                                                          |       |      |        |      |       |   |                   |
|                                                          | OINP       | 43.23 | 6.022  | 56.35       |                           |                                              |                   | <b>Fig. 2f</b> , GWI-CBD<br>Percentage of TOET           | OIFP     | 36.78 | 6.222  | 50.22 | <i>t</i> = 3.003, df = 26 | 1.004, 13, 13 | <i>P</i> < 0.01   | OINP     | 63.17 | 6.209  | 76.58 | <b>Fig. 3b</b> , Naïve,<br>Percentage of TOET            | FO on P2 | 33.73 | 5.064  | 45.41 | <i>t</i> = 4.529, df = 16 | 1.008, 8, 8   | <i>P</i> < 0.001  | NO on P2 | 66.22 | 5.083  | 77.95 | <b>Fig. 3b</b> , GWI-VEH,<br>Percentage of TOET          | FO on P2 | 59.87 | 7.388  | 76.13 | <i>t</i> = 1.887, df = 22 | 1.002, 11, 11 | <i>P</i> > 0.05   | NO on P2 | 40.14 | 7.395  | 56.42 | <b>Fig. 3b</b> , GWI-CBD,<br>Percentage of TOET          | FO on P2 | 41.80 | 4.356  | 51.08 | <i>t</i> = 2.672, df = 30 | 1.002, 15, 15 | <i>P</i> < 0.05   | NO on P2 | 58.25 | 4.351  | 67.53 | <b>Fig. 3e</b> , Naïve,<br>Total volume consumed<br>(ml) | Water    | 4.33  | 0.4354 | 5.25  | U = 5                     | -             | <i>P</i> < 0.0001 | Sucrose  | 12.39 | 0.7718 | 14.02 |                                                          |          |       |        |       |                           |               |                   |          |       |        |       |                                                          |          |       |        |       |                           |               |                   |          |       |        |       |                                                          |          |       |        |       |                           |               |                   |          |       |        |       |                                                          |       |      |        |      |       |   |                   |
| <b>Fig. 2f</b> , GWI-CBD<br>Percentage of TOET           | OIFP       | 36.78 | 6.222  | 50.22       | <i>t</i> = 3.003, df = 26 | 1.004, 13, 13                                | <i>P</i> < 0.01   |                                                          |          |       |        |       |                           |               |                   |          |       |        |       |                                                          |          |       |        |       |                           |               |                   |          |       |        |       |                                                          |          |       |        |       |                           |               |                   |          |       |        |       |                                                          |          |       |        |       |                           |               |                   |          |       |        |       |                                                          |          |       |        |       |                           |               |                   |          |       |        |       |                                                          |          |       |        |       |                           |               |                   |          |       |        |       |                                                          |          |       |        |       |                           |               |                   |          |       |        |       |                                                          |          |       |        |       |                           |               |                   |          |       |        |       |                                                          |       |      |        |      |       |   |                   |
|                                                          | OINP       | 63.17 | 6.209  | 76.58       |                           |                                              |                   | <b>Fig. 3b</b> , Naïve,<br>Percentage of TOET            | FO on P2 | 33.73 | 5.064  | 45.41 | <i>t</i> = 4.529, df = 16 | 1.008, 8, 8   | <i>P</i> < 0.001  | NO on P2 | 66.22 | 5.083  | 77.95 | <b>Fig. 3b</b> , GWI-VEH,<br>Percentage of TOET          | FO on P2 | 59.87 | 7.388  | 76.13 | <i>t</i> = 1.887, df = 22 | 1.002, 11, 11 | <i>P</i> > 0.05   | NO on P2 | 40.14 | 7.395  | 56.42 | <b>Fig. 3b</b> , GWI-CBD,<br>Percentage of TOET          | FO on P2 | 41.80 | 4.356  | 51.08 | <i>t</i> = 2.672, df = 30 | 1.002, 15, 15 | <i>P</i> < 0.05   | NO on P2 | 58.25 | 4.351  | 67.53 | <b>Fig. 3e</b> , Naïve,<br>Total volume consumed<br>(ml) | Water    | 4.33  | 0.4354 | 5.25  | U = 5                     | -             | <i>P</i> < 0.0001 | Sucrose  | 12.39 | 0.7718 | 14.02 |                                                          |          |       |        |       |                           |               |                   |          |       |        |       |                                                          |          |       |        |       |                           |               |                   |          |       |        |       |                                                          |          |       |        |       |                           |               |                   |          |       |        |       |                                                          |          |       |        |       |                           |               |                   |          |       |        |       |                                                          |       |      |        |      |       |   |                   |
| <b>Fig. 3b</b> , Naïve,<br>Percentage of TOET            | FO on P2   | 33.73 | 5.064  | 45.41       | <i>t</i> = 4.529, df = 16 | 1.008, 8, 8                                  | <i>P</i> < 0.001  |                                                          |          |       |        |       |                           |               |                   |          |       |        |       |                                                          |          |       |        |       |                           |               |                   |          |       |        |       |                                                          |          |       |        |       |                           |               |                   |          |       |        |       |                                                          |          |       |        |       |                           |               |                   |          |       |        |       |                                                          |          |       |        |       |                           |               |                   |          |       |        |       |                                                          |          |       |        |       |                           |               |                   |          |       |        |       |                                                          |          |       |        |       |                           |               |                   |          |       |        |       |                                                          |          |       |        |       |                           |               |                   |          |       |        |       |                                                          |       |      |        |      |       |   |                   |
|                                                          | NO on P2   | 66.22 | 5.083  | 77.95       |                           |                                              |                   | <b>Fig. 3b</b> , GWI-VEH,<br>Percentage of TOET          | FO on P2 | 59.87 | 7.388  | 76.13 | <i>t</i> = 1.887, df = 22 | 1.002, 11, 11 | <i>P</i> > 0.05   | NO on P2 | 40.14 | 7.395  | 56.42 | <b>Fig. 3b</b> , GWI-CBD,<br>Percentage of TOET          | FO on P2 | 41.80 | 4.356  | 51.08 | <i>t</i> = 2.672, df = 30 | 1.002, 15, 15 | <i>P</i> < 0.05   | NO on P2 | 58.25 | 4.351  | 67.53 | <b>Fig. 3e</b> , Naïve,<br>Total volume consumed<br>(ml) | Water    | 4.33  | 0.4354 | 5.25  | U = 5                     | -             | <i>P</i> < 0.0001 | Sucrose  | 12.39 | 0.7718 | 14.02 |                                                          |          |       |        |       |                           |               |                   |          |       |        |       |                                                          |          |       |        |       |                           |               |                   |          |       |        |       |                                                          |          |       |        |       |                           |               |                   |          |       |        |       |                                                          |          |       |        |       |                           |               |                   |          |       |        |       |                                                          |          |       |        |       |                           |               |                   |          |       |        |       |                                                          |       |      |        |      |       |   |                   |
| <b>Fig. 3b</b> , GWI-VEH,<br>Percentage of TOET          | FO on P2   | 59.87 | 7.388  | 76.13       | <i>t</i> = 1.887, df = 22 | 1.002, 11, 11                                | <i>P</i> > 0.05   |                                                          |          |       |        |       |                           |               |                   |          |       |        |       |                                                          |          |       |        |       |                           |               |                   |          |       |        |       |                                                          |          |       |        |       |                           |               |                   |          |       |        |       |                                                          |          |       |        |       |                           |               |                   |          |       |        |       |                                                          |          |       |        |       |                           |               |                   |          |       |        |       |                                                          |          |       |        |       |                           |               |                   |          |       |        |       |                                                          |          |       |        |       |                           |               |                   |          |       |        |       |                                                          |          |       |        |       |                           |               |                   |          |       |        |       |                                                          |       |      |        |      |       |   |                   |
|                                                          | NO on P2   | 40.14 | 7.395  | 56.42       |                           |                                              |                   | <b>Fig. 3b</b> , GWI-CBD,<br>Percentage of TOET          | FO on P2 | 41.80 | 4.356  | 51.08 | <i>t</i> = 2.672, df = 30 | 1.002, 15, 15 | <i>P</i> < 0.05   | NO on P2 | 58.25 | 4.351  | 67.53 | <b>Fig. 3e</b> , Naïve,<br>Total volume consumed<br>(ml) | Water    | 4.33  | 0.4354 | 5.25  | U = 5                     | -             | <i>P</i> < 0.0001 | Sucrose  | 12.39 | 0.7718 | 14.02 |                                                          |          |       |        |       |                           |               |                   |          |       |        |       |                                                          |          |       |        |       |                           |               |                   |          |       |        |       |                                                          |          |       |        |       |                           |               |                   |          |       |        |       |                                                          |          |       |        |       |                           |               |                   |          |       |        |       |                                                          |          |       |        |       |                           |               |                   |          |       |        |       |                                                          |          |       |        |       |                           |               |                   |          |       |        |       |                                                          |       |      |        |      |       |   |                   |
| <b>Fig. 3b</b> , GWI-CBD,<br>Percentage of TOET          | FO on P2   | 41.80 | 4.356  | 51.08       | <i>t</i> = 2.672, df = 30 | 1.002, 15, 15                                | <i>P</i> < 0.05   |                                                          |          |       |        |       |                           |               |                   |          |       |        |       |                                                          |          |       |        |       |                           |               |                   |          |       |        |       |                                                          |          |       |        |       |                           |               |                   |          |       |        |       |                                                          |          |       |        |       |                           |               |                   |          |       |        |       |                                                          |          |       |        |       |                           |               |                   |          |       |        |       |                                                          |          |       |        |       |                           |               |                   |          |       |        |       |                                                          |          |       |        |       |                           |               |                   |          |       |        |       |                                                          |          |       |        |       |                           |               |                   |          |       |        |       |                                                          |       |      |        |      |       |   |                   |
|                                                          | NO on P2   | 58.25 | 4.351  | 67.53       |                           |                                              |                   | <b>Fig. 3e</b> , Naïve,<br>Total volume consumed<br>(ml) | Water    | 4.33  | 0.4354 | 5.25  | U = 5                     | -             | <i>P</i> < 0.0001 | Sucrose  | 12.39 | 0.7718 | 14.02 |                                                          |          |       |        |       |                           |               |                   |          |       |        |       |                                                          |          |       |        |       |                           |               |                   |          |       |        |       |                                                          |          |       |        |       |                           |               |                   |          |       |        |       |                                                          |          |       |        |       |                           |               |                   |          |       |        |       |                                                          |          |       |        |       |                           |               |                   |          |       |        |       |                                                          |          |       |        |       |                           |               |                   |          |       |        |       |                                                          |          |       |        |       |                           |               |                   |          |       |        |       |                                                          |       |      |        |      |       |   |                   |
| <b>Fig. 3e</b> , Naïve,<br>Total volume consumed<br>(ml) | Water      | 4.33  | 0.4354 | 5.25        | U = 5                     | -                                            | <i>P</i> < 0.0001 |                                                          |          |       |        |       |                           |               |                   |          |       |        |       |                                                          |          |       |        |       |                           |               |                   |          |       |        |       |                                                          |          |       |        |       |                           |               |                   |          |       |        |       |                                                          |          |       |        |       |                           |               |                   |          |       |        |       |                                                          |          |       |        |       |                           |               |                   |          |       |        |       |                                                          |          |       |        |       |                           |               |                   |          |       |        |       |                                                          |          |       |        |       |                           |               |                   |          |       |        |       |                                                          |          |       |        |       |                           |               |                   |          |       |        |       |                                                          |       |      |        |      |       |   |                   |
|                                                          | Sucrose    | 12.39 | 0.7718 | 14.02       |                           |                                              |                   |                                                          |          |       |        |       |                           |               |                   |          |       |        |       |                                                          |          |       |        |       |                           |               |                   |          |       |        |       |                                                          |          |       |        |       |                           |               |                   |          |       |        |       |                                                          |          |       |        |       |                           |               |                   |          |       |        |       |                                                          |          |       |        |       |                           |               |                   |          |       |        |       |                                                          |          |       |        |       |                           |               |                   |          |       |        |       |                                                          |          |       |        |       |                           |               |                   |          |       |        |       |                                                          |          |       |        |       |                           |               |                   |          |       |        |       |                                                          |       |      |        |      |       |   |                   |

| Experiment                                                 | Parameters | Mean   | SEM     | Upper 95%CI | <i>t</i> , df/U            | <i>F</i> , DF <sub>n</sub> , DF <sub>d</sub> | <i>P</i> -value   |                                                            |          |        |         |        |                            |               |                   |          |        |         |        |                                                            |          |        |         |        |                            |             |                   |          |        |         |        |                                                            |          |        |         |        |                            |             |                 |          |        |         |        |                                                            |          |        |         |        |                            |             |                 |          |        |         |        |                                                            |          |        |        |        |                            |             |                 |          |        |        |        |                                                            |          |        |        |        |                            |             |                 |          |        |        |        |                                                            |       |        |        |        |                            |             |                 |         |        |        |        |                                                            |       |       |       |       |                           |             |                 |         |        |       |        |                                                            |       |       |       |       |        |   |                 |
|------------------------------------------------------------|------------|--------|---------|-------------|----------------------------|----------------------------------------------|-------------------|------------------------------------------------------------|----------|--------|---------|--------|----------------------------|---------------|-------------------|----------|--------|---------|--------|------------------------------------------------------------|----------|--------|---------|--------|----------------------------|-------------|-------------------|----------|--------|---------|--------|------------------------------------------------------------|----------|--------|---------|--------|----------------------------|-------------|-----------------|----------|--------|---------|--------|------------------------------------------------------------|----------|--------|---------|--------|----------------------------|-------------|-----------------|----------|--------|---------|--------|------------------------------------------------------------|----------|--------|--------|--------|----------------------------|-------------|-----------------|----------|--------|--------|--------|------------------------------------------------------------|----------|--------|--------|--------|----------------------------|-------------|-----------------|----------|--------|--------|--------|------------------------------------------------------------|-------|--------|--------|--------|----------------------------|-------------|-----------------|---------|--------|--------|--------|------------------------------------------------------------|-------|-------|-------|-------|---------------------------|-------------|-----------------|---------|--------|-------|--------|------------------------------------------------------------|-------|-------|-------|-------|--------|---|-----------------|
| <b>Fig. 3e</b> , GWI-VEH,<br>Total volume consumed<br>(ml) | Water      | 8.000  | 0.9129  | 9.946       | <i>t</i> = 0.4317, df = 30 | 1.639, 15, 15                                | <i>P</i> > 0.05   |                                                            |          |        |         |        |                            |               |                   |          |        |         |        |                                                            |          |        |         |        |                            |             |                   |          |        |         |        |                                                            |          |        |         |        |                            |             |                 |          |        |         |        |                                                            |          |        |         |        |                            |             |                 |          |        |         |        |                                                            |          |        |        |        |                            |             |                 |          |        |        |        |                                                            |          |        |        |        |                            |             |                 |          |        |        |        |                                                            |       |        |        |        |                            |             |                 |         |        |        |        |                                                            |       |       |       |       |                           |             |                 |         |        |       |        |                                                            |       |       |       |       |        |   |                 |
|                                                            | Sucrose    | 8.500  | 0.7130  | 10.02.      |                            |                                              |                   | <b>Fig. 3e</b> , GWI-CBD,<br>Total volume consumed<br>(ml) | Water    | 3.588  | 0.4461  | 4.534  | <i>t</i> = 2.924, df = 32  | 8.683, 16, 16 | <i>P</i> < 0.01   | Sucrose  | 7.647  | 1.3140  | 10.430 | <b>Fig. S1b</b> , Naïve,<br>Percentage of TOET             | FO       | 28.48  | 4.448   | 38.54  | <i>t</i> = 6.843, df = 18  | 1.000, 9, 9 | <i>P</i> < 0.0001 | NO       | 71.52  | 4.448   | 81.58  | <b>Fig. S1b</b> , Stress,<br>Percentage of TOET            | FO       | 26.93  | 12.13   | 58.11  | <i>t</i> = 2.690, df = 10  | 1.000, 5, 5 | <i>P</i> < 0.05 | NO       | 73.07  | 12.13   | 104.20 | <b>Fig. S1c</b> , DI                                       | Naïve    | 0.4304 | 0.08896 | 0.6317 | <i>t</i> = 0.1422, df = 14 | 4.460, 5, 9 | <i>P</i> > 0.05 | Stress   | 0.4613 | 0.24260 | 1.0850 | <b>Fig. S2b</b> , Naïve,<br>Percentage of TOET             | FO on P2 | 39.51  | 4.385  | 49.43  | <i>t</i> = 3.384, df = 18  | 1.000, 9, 9 | <i>P</i> < 0.01 | NO on P2 | 60.49  | 4.385  | 70.41  | <b>Fig. S2b</b> , Stress,<br>Percentage of TOET            | FO on P2 | 42.10  | 5.068  | 53.57  | <i>t</i> = 2.204, df = 18  | 1.000, 9, 9 | <i>P</i> < 0.05 | NO on P2 | 57.90  | 5.068  | 69.36  | <b>Fig. S2c</b> , DI                                       | Naïve | 0.2098 | 0.0877 | 0.4082 | <i>t</i> = 0.3871, df = 18 | 1.336, 9, 9 | <i>P</i> > 0.05 | Stress  | 0.1580 | 0.1014 | 0.3873 | <b>Fig. S3a</b> , Naïve,<br>Total volume consumed<br>(ml)  | Water | 5.300 | 0.883 | 7.296 | <i>t</i> = 3.280, df = 18 | 1.525, 9, 9 | <i>P</i> < 0.01 | Sucrose | 9.900  | 1.090 | 12.370 | <b>Fig. S3a</b> , Stress,<br>Total volume consumed<br>(ml) | Water | 6.550 | 1.023 | 8.865 | U = 10 | - | <i>P</i> < 0.01 |
| <b>Fig. 3e</b> , GWI-CBD,<br>Total volume consumed<br>(ml) | Water      | 3.588  | 0.4461  | 4.534       | <i>t</i> = 2.924, df = 32  | 8.683, 16, 16                                | <i>P</i> < 0.01   |                                                            |          |        |         |        |                            |               |                   |          |        |         |        |                                                            |          |        |         |        |                            |             |                   |          |        |         |        |                                                            |          |        |         |        |                            |             |                 |          |        |         |        |                                                            |          |        |         |        |                            |             |                 |          |        |         |        |                                                            |          |        |        |        |                            |             |                 |          |        |        |        |                                                            |          |        |        |        |                            |             |                 |          |        |        |        |                                                            |       |        |        |        |                            |             |                 |         |        |        |        |                                                            |       |       |       |       |                           |             |                 |         |        |       |        |                                                            |       |       |       |       |        |   |                 |
|                                                            | Sucrose    | 7.647  | 1.3140  | 10.430      |                            |                                              |                   | <b>Fig. S1b</b> , Naïve,<br>Percentage of TOET             | FO       | 28.48  | 4.448   | 38.54  | <i>t</i> = 6.843, df = 18  | 1.000, 9, 9   | <i>P</i> < 0.0001 | NO       | 71.52  | 4.448   | 81.58  | <b>Fig. S1b</b> , Stress,<br>Percentage of TOET            | FO       | 26.93  | 12.13   | 58.11  | <i>t</i> = 2.690, df = 10  | 1.000, 5, 5 | <i>P</i> < 0.05   | NO       | 73.07  | 12.13   | 104.20 | <b>Fig. S1c</b> , DI                                       | Naïve    | 0.4304 | 0.08896 | 0.6317 | <i>t</i> = 0.1422, df = 14 | 4.460, 5, 9 | <i>P</i> > 0.05 | Stress   | 0.4613 | 0.24260 | 1.0850 | <b>Fig. S2b</b> , Naïve,<br>Percentage of TOET             | FO on P2 | 39.51  | 4.385   | 49.43  | <i>t</i> = 3.384, df = 18  | 1.000, 9, 9 | <i>P</i> < 0.01 | NO on P2 | 60.49  | 4.385   | 70.41  | <b>Fig. S2b</b> , Stress,<br>Percentage of TOET            | FO on P2 | 42.10  | 5.068  | 53.57  | <i>t</i> = 2.204, df = 18  | 1.000, 9, 9 | <i>P</i> < 0.05 | NO on P2 | 57.90  | 5.068  | 69.36  | <b>Fig. S2c</b> , DI                                       | Naïve    | 0.2098 | 0.0877 | 0.4082 | <i>t</i> = 0.3871, df = 18 | 1.336, 9, 9 | <i>P</i> > 0.05 | Stress   | 0.1580 | 0.1014 | 0.3873 | <b>Fig. S3a</b> , Naïve,<br>Total volume consumed<br>(ml)  | Water | 5.300  | 0.883  | 7.296  | <i>t</i> = 3.280, df = 18  | 1.525, 9, 9 | <i>P</i> < 0.01 | Sucrose | 9.900  | 1.090  | 12.370 | <b>Fig. S3a</b> , Stress,<br>Total volume consumed<br>(ml) | Water | 6.550 | 1.023 | 8.865 | U = 10                    | -           | <i>P</i> < 0.01 | Sucrose | 10.370 | 0.493 | 11.490 |                                                            |       |       |       |       |        |   |                 |
| <b>Fig. S1b</b> , Naïve,<br>Percentage of TOET             | FO         | 28.48  | 4.448   | 38.54       | <i>t</i> = 6.843, df = 18  | 1.000, 9, 9                                  | <i>P</i> < 0.0001 |                                                            |          |        |         |        |                            |               |                   |          |        |         |        |                                                            |          |        |         |        |                            |             |                   |          |        |         |        |                                                            |          |        |         |        |                            |             |                 |          |        |         |        |                                                            |          |        |         |        |                            |             |                 |          |        |         |        |                                                            |          |        |        |        |                            |             |                 |          |        |        |        |                                                            |          |        |        |        |                            |             |                 |          |        |        |        |                                                            |       |        |        |        |                            |             |                 |         |        |        |        |                                                            |       |       |       |       |                           |             |                 |         |        |       |        |                                                            |       |       |       |       |        |   |                 |
|                                                            | NO         | 71.52  | 4.448   | 81.58       |                            |                                              |                   | <b>Fig. S1b</b> , Stress,<br>Percentage of TOET            | FO       | 26.93  | 12.13   | 58.11  | <i>t</i> = 2.690, df = 10  | 1.000, 5, 5   | <i>P</i> < 0.05   | NO       | 73.07  | 12.13   | 104.20 | <b>Fig. S1c</b> , DI                                       | Naïve    | 0.4304 | 0.08896 | 0.6317 | <i>t</i> = 0.1422, df = 14 | 4.460, 5, 9 | <i>P</i> > 0.05   | Stress   | 0.4613 | 0.24260 | 1.0850 | <b>Fig. S2b</b> , Naïve,<br>Percentage of TOET             | FO on P2 | 39.51  | 4.385   | 49.43  | <i>t</i> = 3.384, df = 18  | 1.000, 9, 9 | <i>P</i> < 0.01 | NO on P2 | 60.49  | 4.385   | 70.41  | <b>Fig. S2b</b> , Stress,<br>Percentage of TOET            | FO on P2 | 42.10  | 5.068   | 53.57  | <i>t</i> = 2.204, df = 18  | 1.000, 9, 9 | <i>P</i> < 0.05 | NO on P2 | 57.90  | 5.068   | 69.36  | <b>Fig. S2c</b> , DI                                       | Naïve    | 0.2098 | 0.0877 | 0.4082 | <i>t</i> = 0.3871, df = 18 | 1.336, 9, 9 | <i>P</i> > 0.05 | Stress   | 0.1580 | 0.1014 | 0.3873 | <b>Fig. S3a</b> , Naïve,<br>Total volume consumed<br>(ml)  | Water    | 5.300  | 0.883  | 7.296  | <i>t</i> = 3.280, df = 18  | 1.525, 9, 9 | <i>P</i> < 0.01 | Sucrose  | 9.900  | 1.090  | 12.370 | <b>Fig. S3a</b> , Stress,<br>Total volume consumed<br>(ml) | Water | 6.550  | 1.023  | 8.865  | U = 10                     | -           | <i>P</i> < 0.01 | Sucrose | 10.370 | 0.493  | 11.490 |                                                            |       |       |       |       |                           |             |                 |         |        |       |        |                                                            |       |       |       |       |        |   |                 |
| <b>Fig. S1b</b> , Stress,<br>Percentage of TOET            | FO         | 26.93  | 12.13   | 58.11       | <i>t</i> = 2.690, df = 10  | 1.000, 5, 5                                  | <i>P</i> < 0.05   |                                                            |          |        |         |        |                            |               |                   |          |        |         |        |                                                            |          |        |         |        |                            |             |                   |          |        |         |        |                                                            |          |        |         |        |                            |             |                 |          |        |         |        |                                                            |          |        |         |        |                            |             |                 |          |        |         |        |                                                            |          |        |        |        |                            |             |                 |          |        |        |        |                                                            |          |        |        |        |                            |             |                 |          |        |        |        |                                                            |       |        |        |        |                            |             |                 |         |        |        |        |                                                            |       |       |       |       |                           |             |                 |         |        |       |        |                                                            |       |       |       |       |        |   |                 |
|                                                            | NO         | 73.07  | 12.13   | 104.20      |                            |                                              |                   | <b>Fig. S1c</b> , DI                                       | Naïve    | 0.4304 | 0.08896 | 0.6317 | <i>t</i> = 0.1422, df = 14 | 4.460, 5, 9   | <i>P</i> > 0.05   | Stress   | 0.4613 | 0.24260 | 1.0850 | <b>Fig. S2b</b> , Naïve,<br>Percentage of TOET             | FO on P2 | 39.51  | 4.385   | 49.43  | <i>t</i> = 3.384, df = 18  | 1.000, 9, 9 | <i>P</i> < 0.01   | NO on P2 | 60.49  | 4.385   | 70.41  | <b>Fig. S2b</b> , Stress,<br>Percentage of TOET            | FO on P2 | 42.10  | 5.068   | 53.57  | <i>t</i> = 2.204, df = 18  | 1.000, 9, 9 | <i>P</i> < 0.05 | NO on P2 | 57.90  | 5.068   | 69.36  | <b>Fig. S2c</b> , DI                                       | Naïve    | 0.2098 | 0.0877  | 0.4082 | <i>t</i> = 0.3871, df = 18 | 1.336, 9, 9 | <i>P</i> > 0.05 | Stress   | 0.1580 | 0.1014  | 0.3873 | <b>Fig. S3a</b> , Naïve,<br>Total volume consumed<br>(ml)  | Water    | 5.300  | 0.883  | 7.296  | <i>t</i> = 3.280, df = 18  | 1.525, 9, 9 | <i>P</i> < 0.01 | Sucrose  | 9.900  | 1.090  | 12.370 | <b>Fig. S3a</b> , Stress,<br>Total volume consumed<br>(ml) | Water    | 6.550  | 1.023  | 8.865  | U = 10                     | -           | <i>P</i> < 0.01 | Sucrose  | 10.370 | 0.493  | 11.490 |                                                            |       |        |        |        |                            |             |                 |         |        |        |        |                                                            |       |       |       |       |                           |             |                 |         |        |       |        |                                                            |       |       |       |       |        |   |                 |
| <b>Fig. S1c</b> , DI                                       | Naïve      | 0.4304 | 0.08896 | 0.6317      | <i>t</i> = 0.1422, df = 14 | 4.460, 5, 9                                  | <i>P</i> > 0.05   |                                                            |          |        |         |        |                            |               |                   |          |        |         |        |                                                            |          |        |         |        |                            |             |                   |          |        |         |        |                                                            |          |        |         |        |                            |             |                 |          |        |         |        |                                                            |          |        |         |        |                            |             |                 |          |        |         |        |                                                            |          |        |        |        |                            |             |                 |          |        |        |        |                                                            |          |        |        |        |                            |             |                 |          |        |        |        |                                                            |       |        |        |        |                            |             |                 |         |        |        |        |                                                            |       |       |       |       |                           |             |                 |         |        |       |        |                                                            |       |       |       |       |        |   |                 |
|                                                            | Stress     | 0.4613 | 0.24260 | 1.0850      |                            |                                              |                   | <b>Fig. S2b</b> , Naïve,<br>Percentage of TOET             | FO on P2 | 39.51  | 4.385   | 49.43  | <i>t</i> = 3.384, df = 18  | 1.000, 9, 9   | <i>P</i> < 0.01   | NO on P2 | 60.49  | 4.385   | 70.41  | <b>Fig. S2b</b> , Stress,<br>Percentage of TOET            | FO on P2 | 42.10  | 5.068   | 53.57  | <i>t</i> = 2.204, df = 18  | 1.000, 9, 9 | <i>P</i> < 0.05   | NO on P2 | 57.90  | 5.068   | 69.36  | <b>Fig. S2c</b> , DI                                       | Naïve    | 0.2098 | 0.0877  | 0.4082 | <i>t</i> = 0.3871, df = 18 | 1.336, 9, 9 | <i>P</i> > 0.05 | Stress   | 0.1580 | 0.1014  | 0.3873 | <b>Fig. S3a</b> , Naïve,<br>Total volume consumed<br>(ml)  | Water    | 5.300  | 0.883   | 7.296  | <i>t</i> = 3.280, df = 18  | 1.525, 9, 9 | <i>P</i> < 0.01 | Sucrose  | 9.900  | 1.090   | 12.370 | <b>Fig. S3a</b> , Stress,<br>Total volume consumed<br>(ml) | Water    | 6.550  | 1.023  | 8.865  | U = 10                     | -           | <i>P</i> < 0.01 | Sucrose  | 10.370 | 0.493  | 11.490 |                                                            |          |        |        |        |                            |             |                 |          |        |        |        |                                                            |       |        |        |        |                            |             |                 |         |        |        |        |                                                            |       |       |       |       |                           |             |                 |         |        |       |        |                                                            |       |       |       |       |        |   |                 |
| <b>Fig. S2b</b> , Naïve,<br>Percentage of TOET             | FO on P2   | 39.51  | 4.385   | 49.43       | <i>t</i> = 3.384, df = 18  | 1.000, 9, 9                                  | <i>P</i> < 0.01   |                                                            |          |        |         |        |                            |               |                   |          |        |         |        |                                                            |          |        |         |        |                            |             |                   |          |        |         |        |                                                            |          |        |         |        |                            |             |                 |          |        |         |        |                                                            |          |        |         |        |                            |             |                 |          |        |         |        |                                                            |          |        |        |        |                            |             |                 |          |        |        |        |                                                            |          |        |        |        |                            |             |                 |          |        |        |        |                                                            |       |        |        |        |                            |             |                 |         |        |        |        |                                                            |       |       |       |       |                           |             |                 |         |        |       |        |                                                            |       |       |       |       |        |   |                 |
|                                                            | NO on P2   | 60.49  | 4.385   | 70.41       |                            |                                              |                   | <b>Fig. S2b</b> , Stress,<br>Percentage of TOET            | FO on P2 | 42.10  | 5.068   | 53.57  | <i>t</i> = 2.204, df = 18  | 1.000, 9, 9   | <i>P</i> < 0.05   | NO on P2 | 57.90  | 5.068   | 69.36  | <b>Fig. S2c</b> , DI                                       | Naïve    | 0.2098 | 0.0877  | 0.4082 | <i>t</i> = 0.3871, df = 18 | 1.336, 9, 9 | <i>P</i> > 0.05   | Stress   | 0.1580 | 0.1014  | 0.3873 | <b>Fig. S3a</b> , Naïve,<br>Total volume consumed<br>(ml)  | Water    | 5.300  | 0.883   | 7.296  | <i>t</i> = 3.280, df = 18  | 1.525, 9, 9 | <i>P</i> < 0.01 | Sucrose  | 9.900  | 1.090   | 12.370 | <b>Fig. S3a</b> , Stress,<br>Total volume consumed<br>(ml) | Water    | 6.550  | 1.023   | 8.865  | U = 10                     | -           | <i>P</i> < 0.01 | Sucrose  | 10.370 | 0.493   | 11.490 |                                                            |          |        |        |        |                            |             |                 |          |        |        |        |                                                            |          |        |        |        |                            |             |                 |          |        |        |        |                                                            |       |        |        |        |                            |             |                 |         |        |        |        |                                                            |       |       |       |       |                           |             |                 |         |        |       |        |                                                            |       |       |       |       |        |   |                 |
| <b>Fig. S2b</b> , Stress,<br>Percentage of TOET            | FO on P2   | 42.10  | 5.068   | 53.57       | <i>t</i> = 2.204, df = 18  | 1.000, 9, 9                                  | <i>P</i> < 0.05   |                                                            |          |        |         |        |                            |               |                   |          |        |         |        |                                                            |          |        |         |        |                            |             |                   |          |        |         |        |                                                            |          |        |         |        |                            |             |                 |          |        |         |        |                                                            |          |        |         |        |                            |             |                 |          |        |         |        |                                                            |          |        |        |        |                            |             |                 |          |        |        |        |                                                            |          |        |        |        |                            |             |                 |          |        |        |        |                                                            |       |        |        |        |                            |             |                 |         |        |        |        |                                                            |       |       |       |       |                           |             |                 |         |        |       |        |                                                            |       |       |       |       |        |   |                 |
|                                                            | NO on P2   | 57.90  | 5.068   | 69.36       |                            |                                              |                   | <b>Fig. S2c</b> , DI                                       | Naïve    | 0.2098 | 0.0877  | 0.4082 | <i>t</i> = 0.3871, df = 18 | 1.336, 9, 9   | <i>P</i> > 0.05   | Stress   | 0.1580 | 0.1014  | 0.3873 | <b>Fig. S3a</b> , Naïve,<br>Total volume consumed<br>(ml)  | Water    | 5.300  | 0.883   | 7.296  | <i>t</i> = 3.280, df = 18  | 1.525, 9, 9 | <i>P</i> < 0.01   | Sucrose  | 9.900  | 1.090   | 12.370 | <b>Fig. S3a</b> , Stress,<br>Total volume consumed<br>(ml) | Water    | 6.550  | 1.023   | 8.865  | U = 10                     | -           | <i>P</i> < 0.01 | Sucrose  | 10.370 | 0.493   | 11.490 |                                                            |          |        |         |        |                            |             |                 |          |        |         |        |                                                            |          |        |        |        |                            |             |                 |          |        |        |        |                                                            |          |        |        |        |                            |             |                 |          |        |        |        |                                                            |       |        |        |        |                            |             |                 |         |        |        |        |                                                            |       |       |       |       |                           |             |                 |         |        |       |        |                                                            |       |       |       |       |        |   |                 |
| <b>Fig. S2c</b> , DI                                       | Naïve      | 0.2098 | 0.0877  | 0.4082      | <i>t</i> = 0.3871, df = 18 | 1.336, 9, 9                                  | <i>P</i> > 0.05   |                                                            |          |        |         |        |                            |               |                   |          |        |         |        |                                                            |          |        |         |        |                            |             |                   |          |        |         |        |                                                            |          |        |         |        |                            |             |                 |          |        |         |        |                                                            |          |        |         |        |                            |             |                 |          |        |         |        |                                                            |          |        |        |        |                            |             |                 |          |        |        |        |                                                            |          |        |        |        |                            |             |                 |          |        |        |        |                                                            |       |        |        |        |                            |             |                 |         |        |        |        |                                                            |       |       |       |       |                           |             |                 |         |        |       |        |                                                            |       |       |       |       |        |   |                 |
|                                                            | Stress     | 0.1580 | 0.1014  | 0.3873      |                            |                                              |                   | <b>Fig. S3a</b> , Naïve,<br>Total volume consumed<br>(ml)  | Water    | 5.300  | 0.883   | 7.296  | <i>t</i> = 3.280, df = 18  | 1.525, 9, 9   | <i>P</i> < 0.01   | Sucrose  | 9.900  | 1.090   | 12.370 | <b>Fig. S3a</b> , Stress,<br>Total volume consumed<br>(ml) | Water    | 6.550  | 1.023   | 8.865  | U = 10                     | -           | <i>P</i> < 0.01   | Sucrose  | 10.370 | 0.493   | 11.490 |                                                            |          |        |         |        |                            |             |                 |          |        |         |        |                                                            |          |        |         |        |                            |             |                 |          |        |         |        |                                                            |          |        |        |        |                            |             |                 |          |        |        |        |                                                            |          |        |        |        |                            |             |                 |          |        |        |        |                                                            |       |        |        |        |                            |             |                 |         |        |        |        |                                                            |       |       |       |       |                           |             |                 |         |        |       |        |                                                            |       |       |       |       |        |   |                 |
| <b>Fig. S3a</b> , Naïve,<br>Total volume consumed<br>(ml)  | Water      | 5.300  | 0.883   | 7.296       | <i>t</i> = 3.280, df = 18  | 1.525, 9, 9                                  | <i>P</i> < 0.01   |                                                            |          |        |         |        |                            |               |                   |          |        |         |        |                                                            |          |        |         |        |                            |             |                   |          |        |         |        |                                                            |          |        |         |        |                            |             |                 |          |        |         |        |                                                            |          |        |         |        |                            |             |                 |          |        |         |        |                                                            |          |        |        |        |                            |             |                 |          |        |        |        |                                                            |          |        |        |        |                            |             |                 |          |        |        |        |                                                            |       |        |        |        |                            |             |                 |         |        |        |        |                                                            |       |       |       |       |                           |             |                 |         |        |       |        |                                                            |       |       |       |       |        |   |                 |
|                                                            | Sucrose    | 9.900  | 1.090   | 12.370      |                            |                                              |                   | <b>Fig. S3a</b> , Stress,<br>Total volume consumed<br>(ml) | Water    | 6.550  | 1.023   | 8.865  | U = 10                     | -             | <i>P</i> < 0.01   | Sucrose  | 10.370 | 0.493   | 11.490 |                                                            |          |        |         |        |                            |             |                   |          |        |         |        |                                                            |          |        |         |        |                            |             |                 |          |        |         |        |                                                            |          |        |         |        |                            |             |                 |          |        |         |        |                                                            |          |        |        |        |                            |             |                 |          |        |        |        |                                                            |          |        |        |        |                            |             |                 |          |        |        |        |                                                            |       |        |        |        |                            |             |                 |         |        |        |        |                                                            |       |       |       |       |                           |             |                 |         |        |       |        |                                                            |       |       |       |       |        |   |                 |
| <b>Fig. S3a</b> , Stress,<br>Total volume consumed<br>(ml) | Water      | 6.550  | 1.023   | 8.865       | U = 10                     | -                                            | <i>P</i> < 0.01   |                                                            |          |        |         |        |                            |               |                   |          |        |         |        |                                                            |          |        |         |        |                            |             |                   |          |        |         |        |                                                            |          |        |         |        |                            |             |                 |          |        |         |        |                                                            |          |        |         |        |                            |             |                 |          |        |         |        |                                                            |          |        |        |        |                            |             |                 |          |        |        |        |                                                            |          |        |        |        |                            |             |                 |          |        |        |        |                                                            |       |        |        |        |                            |             |                 |         |        |        |        |                                                            |       |       |       |       |                           |             |                 |         |        |       |        |                                                            |       |       |       |       |        |   |                 |
|                                                            | Sucrose    | 10.370 | 0.493   | 11.490      |                            |                                              |                   |                                                            |          |        |         |        |                            |               |                   |          |        |         |        |                                                            |          |        |         |        |                            |             |                   |          |        |         |        |                                                            |          |        |         |        |                            |             |                 |          |        |         |        |                                                            |          |        |         |        |                            |             |                 |          |        |         |        |                                                            |          |        |        |        |                            |             |                 |          |        |        |        |                                                            |          |        |        |        |                            |             |                 |          |        |        |        |                                                            |       |        |        |        |                            |             |                 |         |        |        |        |                                                            |       |       |       |       |                           |             |                 |         |        |       |        |                                                            |       |       |       |       |        |   |                 |

| Experiment                                                     | Parameters | Mean   | SEM   | Upper 95%CI | <i>t</i> , df/U            | <i>F</i> , DFn, DFd | <i>P</i> -value |
|----------------------------------------------------------------|------------|--------|-------|-------------|----------------------------|---------------------|-----------------|
| <b>Fig. S3b</b> , SPR                                          | Naïve      | 64.87  | 4.935 | 76.03       | <i>t</i> = 0.2628, df = 18 | 2.112, 9, 9         | <i>P</i> > 0.05 |
|                                                                | Stress     | 63.29  | 3.396 | 70.97       |                            |                     |                 |
| <b>Fig. S3b</b> , Total volume consumed (ml)                   | Naïve      | 15.20  | 1.236 | 18.00       | <i>t</i> = 1.212, df = 18  | 1.279, 9, 9         | <i>P</i> > 0.05 |
|                                                                | Stress     | 17.20  | 1.093 | 19.67       |                            |                     |                 |
| <b>Fig. S4</b> , % of IBA-1 <sup>+</sup> cells expressing CD68 | Naïve      | 15.23  | 1.287 | 18.80       | <i>t</i> = 0.9818, df = 8  | 4.482, 4, 4         | <i>P</i> > 0.05 |
|                                                                | Stress     | 18.19  | 2.724 | 25.75       |                            |                     |                 |
| <b>Fig. S5</b> , DCX <sup>+</sup> newly born neurons (SGZ-GCL) | Naïve      | 11,786 | 1041  | 14,332      | <i>t</i> = 0.3231, df = 11 | 1.970, 5, 6         | <i>P</i> > 0.05 |
|                                                                | Stress     | 12,380 | 1578  | 1643        |                            |                     |                 |

*TOET* total object exploration times, *DI* discrimination index, *SPR* sucrose preference rate, *IBA-1* ionized calcium-binding adapter molecule-1, *CD68* cluster of differentiation 68, *GCL* granule cell layer, *SGZ* subgranular zone, *DCX* doublecortin, *GWI* Gulf War Illness, *CBD* cannabidiol, *VEH* vehicle

**Table S5** Statistical data from two-way repeated measures ANOVA

| <b>ANOVA table</b> | <b>Sum of squares (SS)</b> | <b>df</b> | <b>Mean square (MS)</b> | <b>F (DFn, DFd)</b>       | <b>P-value</b> |
|--------------------|----------------------------|-----------|-------------------------|---------------------------|----------------|
| Weeks × Treatment  | 18,997                     | 15        | 1266                    | $F(15, 435) = 1.023$      | $P = 0.4292$   |
| Weeks              | 181,631                    | 15        | 12,109                  | $F(3.078, 89.27) = 9.786$ | $P < 0.0001$   |
| Treatment          | 4593                       | 1         | 4593                    | $F(1, 29) = 0.3152$       | $P = 0.5788$   |

---

**Difference between column means**

---

|                          |                 |
|--------------------------|-----------------|
| Mean of GWI-VEH          | 764.4           |
| Mean of GWI-CBD          | 758.3           |
| Difference between means | 6.115           |
| SE of difference         | 10.89           |
| 95%CI of difference      | -16.16 to 28.39 |

---

*GWI* Gulf War Illness, *CBD* cannabidiol, *VEH* vehicle

## References

1. Hattiangady B, Mishra V, Kodali M, Shuai B, Rao X, Shetty AK. Object location and object recognition memory impairments, motivation deficits and depression in a model of Gulf War illness. *Front Behav Neurosci.* 2014;8:78.
2. Madhu LN, Kodali M, Attaluri S, Shuai B, Melissari L, Rao X, et al. Melatonin improves brain function in a model of chronic Gulf War Illness with modulation of oxidative stress, NLRP3 inflammasomes, and BDNF-ERK-CREB pathway in the hippocampus. *Redox Biol.* 2021;43:101973.
3. Jain S, Yoon SY, Zhu L, Brodbeck J, Dai J, Walker D, et al. Arf4 determines dentate gyrus-mediated pattern separation by regulating dendritic spine development. *PLoS One.* 2012;7(9):e46340.
4. van Goethem NP, van Hagen BTJ, Prickaerts J. Assessing spatial pattern separation in rodents using the object pattern separation task. *Nat Protoc.* 2018;13(8):1763-92.
5. Kodali M, Madhu LN, Reger RL, Milutinovic B, Upadhy R, Gonzalez JJ, et al. Intranasally administered human MSC-derived extracellular vesicles inhibit NLRP3-p38/MAPK signaling after TBI and prevent chronic brain dysfunction. *Brain Behav Immun.* 2023;108:118-34.
6. Ayyubova G, Kodali M, Upadhy R, Madhu LN, Attaluri S, Somayaji Y, et al. Extracellular vesicles from hiPSC-NSCs can prevent peripheral inflammation-induced cognitive dysfunction with inflammasome inhibition and improved neurogenesis in the hippocampus. *J Neuroinflammation.* 2023;20(1):297.
